# Supplementary material for: The role of management instruments in the diversion of organic municipal solid waste and phosphorus recycling
Source: Atypon-hosted journal article supplement (doi:10.1139/facets-2018-0005), 2018-09-27
Supplement: facets-2018-0005_supplement1.pdf [file facets-2018-0005_supplement1.pdf]

## Supporting Information

### **The role of management instruments in organic municipal solid waste diversion and phosphorus recycling**

*Jillian L. Treadwell<sup>†\*</sup>, Elena M. Bennett<sup>§‡</sup>, O. Grant Clark<sup>†‡</sup>*

<sup>†</sup> Department of Bioresource Engineering, Faculty of Agricultural and Environmental Sciences, McGill University, 21,111 Lakeshore Rd.  
Ste-Anne de Bellevue, Quebec H9X 3V9, Canada

<sup>§</sup> Department of Natural Resource Sciences, Faculty of Agricultural and Environmental Sciences, McGill University, 21,111 Lakeshore Rd.  
Ste-Anne de Bellevue, Quebec H9X 3V9, Canada

<sup>‡</sup> McGill School of Environment, McGill University, 3534 University St.  
Montreal, Quebec H3A 2A7, Canada

Corresponding author email: [jilliantreadwell@gmail.com](mailto:jilliantreadwell@gmail.com)

## TABLE OF CONTENTS

|                                                                                                   |     |
|---------------------------------------------------------------------------------------------------|-----|
| GENERAL TERMINOLOGY .....                                                                         | S3  |
| LITERATURE ANALYSIS SEARCH STRING FOR PHOSPHORUS IN<br>CENTRALIZED ORGANIC WASTE PROCESSING ..... | S3  |
| ADDITIONAL TABLES AND FIGURES .....                                                               | S4  |
| Table S1. EU Landfill Diversion Year Index. ....                                                  | S4  |
| Table S2. Univariate regression analysis of explanatory variables for Europe and<br>Ontario.....  | S5  |
| Table S3. Phosphorus losses during biologic processing of organic waste.....                      | S7  |
| Table S4. Reapplication of organic products to arable land .....                                  | S8  |
| Figure S1. Categorical data factor analysis of mixed data (FAMD):.....                            | S9  |
| DATA AND SOURCES FOR ORGANIC WASTE DIVERSION AND KEY FACTORS<br>.....                             | S10 |
| Table S5: European summary of organic waste diversion and factor data.....                        | S11 |
| Table S6: European waste composition data .....                                                   | S12 |
| Table S7: European per capita waste diversion and generation. ....                                | S13 |
| Table S8: European waste diversion data by EU Landfill Directive target year.....                 | S14 |
| Table S9: European rate of organic waste diversion .....                                          | S15 |
| Table S10: Ontario summary of organic waste diversion and factor data .....                       | S16 |
| Table S11: Ontario municipal contact data collection .....                                        | S19 |
| Table S12: Detailed annual Ontario diversion data.....                                            | S22 |
| REFERENCES .....                                                                                  | S25 |

## GENERAL TERMINOLOGY

Organic fraction of municipal solid waste (OFMSW): includes biodegradable waste material such as food waste, and leaf and yard waste that is produced and disposed of by the public, and often managed centrally. It is sometimes referred to as bio-waste, green waste, biodegradable municipal waste (BMW), organic waste, and/or putrescible waste.

Organic waste diversion: management of organic waste so that instead of being buried in landfills or incinerated, it is sent to an alternative processing facility such as a composting plant or an anaerobic digester.

Reapplication: refers to the application of processed organic waste (e.g. compost or digestate) to arable land.

Recycling: the conversion of waste material into a reusable material.

Source Separated Organics (SSO): organic waste that has been separated at the source (e.g. family residence, restaurant, or business) from other waste streams by the generator/user prior to any pre-processing. It does not include human excreta.

## LITERATURE ANALYSIS SEARCH STRING FOR PHOSPHORUS IN CENTRALIZED ORGANIC WASTE PROCESSING

Search string used in Web of Science: TS= (mass OR element OR nutrient) AND TS= (balance OR flow) AND TS= (organic OR green OR bio\* OR food) AND TS= (waste) AND TS=(compost OR anaerobic\* OR aerobic) AND TS= (manag\* OR process\* OR recyc\* OR treat\*) AND TS= (phosphorus OR nutrient OR element) AND TS= (municip\* OR kerb\* OR curb\* OR solid OR "source separat\*")

## ADDITIONAL TABLES AND FIGURES

Table S1. EU Landfill Diversion Year Index.

| Acronym | Title                        | Description                                                                                                                                        |
|---------|------------------------------|----------------------------------------------------------------------------------------------------------------------------------------------------|
| BY      | Base Year                    | Before policy was announced                                                                                                                        |
|         | (Year 1)                     | 1995 in most cases                                                                                                                                 |
| DY1     | Diversion Year 1             | First diversion target year                                                                                                                        |
|         |                              | Biodegradable municipal waste should be reduced to 75% by weight of base year<br>2006 for non-derogation countries                                 |
| DY2     | Diversion Year 2<br>(Year 2) | Second diversion target year                                                                                                                       |
|         |                              | Biodegradable municipal waste should be reduced to 50% by weight of base year<br>Generally 3 years after DY1                                       |
| DY3     | Diversion Year 3             | Third diversion target year                                                                                                                        |
|         |                              | Biodegradable municipal waste should be reduced to 35% by weight of base year<br>Generally 10 years after DY1<br>2016 for non-derogation countries |

Note: The EU Landfill Directive organic waste to landfill ban was phased in over three stages as the diversion restrictions increased from 0% to 65%. As many countries received varying derogation periods, the annual requirements varied across countries. An index was created in order to make comparisons across countries in relation to policy targets enforced in different years. The table below defines each of the Diversion Years.

Table S2. Univariate regression analysis of explanatory variables for Europe and Ontario; selected and analyzed socio-economic and waste management indicators, mean, and individual correlation with organic waste diversion (adjusted R<sup>2</sup> and significance).

| Variable name                                     | Variable label | Data type   | Mean <sup>a</sup>             | Min <sup>a</sup>              | Max <sup>a</sup>              | Normality/trans <sup>b</sup>        | Correlation w/ organic waste diversion rate <sup>c</sup> | Standard Error      | Confidence interval  |                     |  |
|---------------------------------------------------|----------------|-------------|-------------------------------|-------------------------------|-------------------------------|-------------------------------------|----------------------------------------------------------|---------------------|----------------------|---------------------|--|
|                                                   |                |             |                               |                               |                               |                                     | (adjusted R <sup>2</sup> )                               |                     | 2.50%                | 97.50%              |  |
| <b>Europe (organic waste diversion)</b>           |                |             |                               |                               |                               |                                     |                                                          |                     |                      |                     |  |
| Income (Int'l \$/capita <sup>d</sup> )            | IN             | Continuous  | 20157                         | 5060                          | 36930                         | TB: R <sup>√</sup> , E <sup>†</sup> | 0.506 ***                                                | 0.134               | 0.453                | 1.000               |  |
| Population Density (inhabitants/km <sup>2</sup> ) | PD             | Continuous  | 155                           | 2.9                           | 1218                          | TB: R <sup>√</sup> , E <sup>√</sup> | 0.011                                                    | 0.009               | -0.008               | 0.028               |  |
| Landfill Charge (€/tonne)                         | LF             | Continuous  | 75                            | 3.7                           | 156                           | TB: R <sup>√</sup> , E <sup>†</sup> | 0.435 ***                                                | 0.071               | 0.192                | 0.484               |  |
| Pay-as-you-throw                                  | PAYT           | Binary      | N: 0.11<br>Y: 0.37            | N: 0.01<br>Y: 0.07            | N: 0.26<br>Y: 0.78            | TR: R <sup>√</sup>                  | 0.238 **                                                 | 0.09                | 0.096                | 0.464               |  |
| Legislation                                       | LEG            | Categorical | 0: 0.23<br>1: 0.37<br>2: 0.55 | 0: 0.01<br>1: 0.08<br>2: 0.23 | 0: 0.46<br>1: 0.75<br>2: 0.78 | TR <sup>c</sup> : R <sup>‡</sup>    | 0.232 *                                                  | -<br>0.452<br>0.568 | -<br>-0.057<br>0.586 | -<br>1.800<br>2.920 |  |
| Mandatory Separation                              | MS             | Binary      | N: 0.28<br>Y: 0.45            | N: 0.01<br>Y: 0.23            | N: 0.78<br>Y: 0.7             | TR: R <sup>‡</sup>                  | 0.097 .                                                  | 0.491               | -0.023               | 1.990               |  |
| Incineration Tax                                  | IT             | Binary      | N: 0.26<br>Y: 0.49            | N: 0.01<br>Y: 0.23            | N: 0.78<br>Y: 0.75            | TR: R <sup>‡</sup>                  | 0.182 *                                                  | 0.468               | 0.297                | 2.220               |  |
| Incineration Ban                                  | IB             | Binary      | N: 0.32<br>Y: 0.38            | N: 0.01<br>Y: 0.13            | N: 0.75<br>Y: 0.78            | TR: R <sup>‡</sup>                  | -0.028                                                   | 0.769               | -1.200               | 1.960               |  |
| <b>Europe (Δ organic waste diversion)</b>         |                |             |                               |                               |                               |                                     |                                                          |                     |                      |                     |  |
| Income (Int'l \$/capita <sup>d</sup> )            | IN             | Continuous  | 20157                         | 5060                          | 36930                         | TB: R <sup>√</sup> , E <sup>†</sup> | 0.132 *                                                  | 0.159               | 0.038                | 0.690               |  |
| Population Density (inhabitants/km <sup>2</sup> ) | PD             | Continuous  | 155                           | 2.9                           | 1218                          | TB: R <sup>√</sup> , E <sup>√</sup> | -0.008                                                   | 0.008               | -0.023               | 0.009               |  |
| Landfill Charge (€/tonne)                         | LF             | Continuous  | 75                            | 3.7                           | 156                           | TB: R <sup>‡</sup> , E <sup>†</sup> | 0.209 **                                                 | 0.484               | 0.408                | 2.393               |  |
| Pay-as-you-throw                                  | PAYT           | Binary      | N: 0.1<br>Y: 0.22             | N: 0.01<br>Y: 0               | N: 0.26<br>Y: 0.69            | TR: R <sup>‡</sup>                  | 0.09 .                                                   | 0.562               | -0.061               | 2.225               |  |
| Legislation                                       | LEG            | Categorical | 0: 0.18<br>1: 0.21            | 0: 0<br>1: 0.07               | 0: 0.46<br>1: 0.45            | TR: R <sup>‡</sup>                  | -0.038                                                   | -<br>0.491          | -<br>-0.573          | -<br>1.441          |  |

|                                                   |      |             |    |        |    |       |    |         |                                      |        |          |           |          |       |
|---------------------------------------------------|------|-------------|----|--------|----|-------|----|---------|--------------------------------------|--------|----------|-----------|----------|-------|
|                                                   |      |             | 2: | 0.23   | 2: | 0.01  | 2: | 0.69    |                                      |        | 0.626    | -1.196    | 1.373    |       |
| Mandatory Separation                              | MS   | Binary      | N: | 0.18   | N: | 0     | N: | 0.69    | TR: R <sup>√</sup>                   | -0.01  | 0.078    | -0.095    | 0.227    |       |
|                                                   |      |             | Y: | 0.23   | Y: | 0.01  | Y: | 0.45    |                                      |        |          |           |          |       |
| Incineration Tax                                  | IT   | Binary      | N: | 0.2    | N: | 0.01  | N: | 0.69    | TR: R <sup>√</sup>                   | -0.036 | 0.079    | -0.174    | 0.152    |       |
|                                                   |      |             | Y: | 0.19   | Y: | 0     | Y: | 0.4     |                                      |        |          |           |          |       |
| Incineration Ban                                  | IB   | Binary      | N: | 0.18   | N: | 0     | N: | 0.46    | TR <sup>d</sup> : R <sup>√</sup>     | 0.034  | 0.116    | -0.075    | 0.403    |       |
|                                                   |      |             | Y: | 0.34   | Y: | 0.11  | Y: | 0.69    |                                      |        |          |           |          |       |
| <b>Ontario (organic waste diversion)</b>          |      |             |    |        |    |       |    |         |                                      |        |          |           |          |       |
| Income (CAD \$/tonne)                             | IN   | Continuous  |    | 30299  |    | 20628 |    | 43709   | TR: R <sup>‡</sup>                   | 0.006  | 3.99E-05 | -2.67E-05 | 1.16E-04 |       |
| Population Density (inhabitants/km <sup>2</sup> ) | PD   | Continuous  |    | 323    |    | 0.32  |    | 4149    | TB: R <sup>‡</sup> , E <sup>†</sup>  | 0.236  | ***      | 0.153     | 0.547    | 1.152 |
| Population (inhabitants)                          | POP  | Continuous  |    | 121315 |    | 204   |    | 2615060 | TB: R <sup>‡</sup> , E <sup>√</sup>  | 0.257  | ***      | 0.000     | 0.002    | 0.004 |
| Landfill Charge (CAD \$/tonne)                    | LF   | Continuous  |    | 94.9   |    | 11.1  |    | 200     | TR: R <sup>‡</sup>                   | 0.065  | **       | 0.005     | 0.004    | 0.022 |
| Pay-as-you-throw                                  | PAYT | Binary      | N: | 0.12   | N: | 0.00  | N: | 0.57    | TR: R <sup>‡</sup>                   | 0.096  | **       | 0.316     | 0.436    | 1.690 |
|                                                   |      |             | Y: | 0.27   | Y: | 0.00  | Y: | 0.82    |                                      |        |          |           |          |       |
| Bag Limit                                         | BL   | Binary      | N: | 0.2    | N: | 0.00  | N: | 0.82    | TR: R <sup>‡</sup>                   | 0.0145 |          | 0.309     | -0.132   | 1.095 |
|                                                   |      |             | Y: | 0.26   | Y: | 0.00  | Y: | 0.69    |                                      |        |          |           |          |       |
| Leaf & Yard waste                                 | LY   | Binary      | N: | 0.06   | N: | 0.00  | N: | 0.3     | TR: R <sup>‡</sup>                   | 0.211  | ***      | 0.344     | 1.104    | 2.471 |
|                                                   |      |             | Y: | 0.26   | Y: | 0.00  | Y: | 0.82    |                                      |        |          |           |          |       |
| Green bin                                         | GB   | Binary      | N: | 0.14   | N: | 0.00  | N: | 0.62    | TR: R <sup>‡</sup>                   | 0.38   | ***      | 0.275     | 1.592    | 2.683 |
|                                                   |      |             | Y: | 0.48   | Y: | 0.22  | Y: | 0.82    |                                      |        |          |           |          |       |
| Infrastructure                                    | INF  | Categorical | 0: | 0.06   | 0: | 0.00  | 0: | 0.3     |                                      |        |          | -         | -        | -     |
|                                                   |      |             | 1: | 0.15   | 1: | 0.00  | 1: | 0.5     | TR: R <sup>‡</sup>                   | 0.461  | ***      | 0.318     | 0.587    | 1.852 |
|                                                   |      |             | 2: | 0.19   | 2: | 0.00  | 2: | 0.62    |                                      |        |          | 0.399     | 0.534    | 2.119 |
|                                                   |      |             | 3: | 0.48   | 3: | 0.22  | 3: | 0.82    |                                      |        |          | 0.352     | 2.414    | 3.812 |
| Implementation                                    | IMP  | Continuous  |    | 2.00   |    | 0.00  |    | 19.00   | TB: R <sup>‡</sup> , E <sup>††</sup> | 0.358  | ***      | 0.295     | 1.600    | 2.769 |

<sup>a</sup> Mean, minimum, and maximum for binary and categorical data represents the mean, minimum and maximum organic waste diversion rate at each interval; absence of factor (N), presence of factor (Y), scale of implementation (0-3)

<sup>b</sup> Response variable only transformed (TR), Both response and explanatory transformed (TB); Response variable (R), Explanatory variable (E); transformations: square root (<sup>√</sup>), log<sub>10</sub> (<sup>†</sup>), log<sub>10</sub>+1 (<sup>††</sup>), logit (<sup>‡</sup>)

<sup>c</sup> Significance: '\*\*\*' 0.001, '\*\*' 0.01, '\*' 0.05, '.' 0.1, ' ' 1

<sup>d</sup> International Dollars (Int'l \$) was based on conversion from local currency using UN Purchasing Power Parties (PPP) conversion factors for 2011

<sup>e</sup> Transformation resulted in moderate fulfillment of linear regression assumptions, considered adequate for the purpose of this analysis

Table S3. Phosphorus losses during biologic processing of organic waste.

| System component      | Recorded Loss      | Min Loss           | Max Loss          | Source                               | Plant type <sup>a</sup> | Location of research | Feedstock <sup>b</sup>                    |
|-----------------------|--------------------|--------------------|-------------------|--------------------------------------|-------------------------|----------------------|-------------------------------------------|
| Biological processing | 67.2%              | -                  | -                 | Banks et al. (2011) <sup>2</sup>     | AD                      | UK                   | SSO                                       |
| Biological processing | 13.7%              | 29.4% <sup>c</sup> | 100% <sup>d</sup> | Zabaleta & Rodic (2015) <sup>3</sup> | MBT                     | Spain                | OFMSW                                     |
| Biological processing | 19.5% <sup>e</sup> | 1.0%               | 38%               | Zabaleta & Rodic (2015) <sup>3</sup> | AC                      | Multiple             | MSW                                       |
| Biological processing | 18.5%              | 13.6%              | 23.3%             | Pognani et al. (2012) <sup>4</sup>   | MBT                     | Spain                | MSW                                       |
| Pre-treatment         | 16.5%              | -                  | -                 | Pognani et al. (2012) <sup>4</sup>   | MBT                     | Spain                | MSW                                       |
| Leachate              | 1.0%               | -                  | -                 | Pognani et al. (2012) <sup>4</sup>   | MBT                     | Spain                | MSW                                       |
| Refining              | 5.8%               | -                  | -                 | Pognani et al. (2012) <sup>4</sup>   | MBT                     | Spain                | MSW                                       |
| Leachate              | 3.0%               | -                  | -                 | Andersen et al. (2010) <sup>1</sup>  | WC                      | Denmark              | L&Y                                       |
| Biological processing | 1.0%               | -6.0% <sup>f</sup> | 6.0%              | Field (1984) <sup>5</sup>            | AD                      | USA                  | Farm                                      |
| Biological processing | 7.5% <sup>e</sup>  | 6.0%               | 9.0%              | Schievano et al. (2011) <sup>6</sup> | AD                      | Italy                | SSO, FC, FM, industry organic by-products |
| Biological processing | 10.0%              | -                  | -                 | Möller & Müller (2012) <sup>7</sup>  | AD                      | Germany              | FC, FM                                    |
| Biological processing | 36.0%              | -                  | -                 | Marcato et al. (2008) <sup>8</sup>   | AD                      | France               | FM                                        |
| Biological processing | 16.5% <sup>e</sup> | 12%                | 21%               | Michel et al. (2004) <sup>9</sup>    | AC                      | USA                  | Farm (saw dust amended)                   |
| Biological processing | 19.5% <sup>e</sup> | 1%                 | 38%               | Michel et al. (2004) <sup>9</sup>    | AC                      | USA                  | Farm (straw amended)                      |
| Biological processing | 25.5%              | 18%                | 33%               | Massé & Massé (2007) <sup>10</sup>   | AD                      | Canada               | FM                                        |
| Biological processing | -                  | 23%                | 29%               | Tiquia et al. (2002) <sup>11</sup>   | AC                      | USA                  | Farm                                      |
| <b>Median</b>         | <b>18.5%</b>       | <b>12%</b>         | <b>29%</b>        | -                                    | -                       | -                    | -                                         |
| <b>Average</b>        | <b>21.4%</b>       | <b>11%</b>         | <b>33%</b>        | -                                    | -                       | -                    | -                                         |

<sup>a</sup> Anaerobic digestion (AD), mechanical biological treatment (MBT), aerobic composting (AC), windrow composting (WC)

<sup>b</sup> Source-separated organics (SSO), organic fraction of municipal solid waste (OFMSW), municipal solid waste (MSW), Leaf and yard waste (L&Y), farm crop (FC), farm manure (FM), farm unspecified (Farm)

<sup>c</sup> Minimum loss and recorded loss do not match up due to data inconsistencies

<sup>d</sup> Issues with plant operation

<sup>e</sup> Average of minimum and maximum loss

<sup>f</sup> Recorded range from 94-106% P recovery

Table S4. Reapplication of organic products to arable land

| <b>System Component</b> | <b>Mean<sup>a</sup></b> | <b>Min.<sup>a</sup></b> | <b>Max.<sup>a</sup></b> | <b>Source</b>                     | <b>End Product</b>            | <b>Location</b> |
|-------------------------|-------------------------|-------------------------|-------------------------|-----------------------------------|-------------------------------|-----------------|
| Distribution            | 59%                     | -                       | -                       | van der Werf (2013) <sup>12</sup> | Compost                       | Ontario         |
| agriculture             | 34%                     | -                       | -                       | van der Werf (2013) <sup>12</sup> | Compost                       | Ontario         |
| horticulture            | 25%                     | -                       | -                       | van der Werf (2013) <sup>12</sup> | Compost                       | Ontario         |
| Distribution            | 70%                     | 0%                      | 88%                     | Barth (2008) <sup>13</sup>        | Compost                       | Europe          |
| agriculture             | 48%                     | 0%                      | 88%                     | Barth (2008) <sup>13</sup>        | Compost                       | Europe          |
| horticulture            | 11%                     | 0%                      | 25%                     | Barth (2008) <sup>13</sup>        | Compost                       | Europe          |
| hobby gardening         | 11%                     | 0%                      | 27%                     | Barth (2008) <sup>13</sup>        | Compost                       | Europe          |
| Distribution            | 65%                     | 34%                     | 100%                    | Zhang et al. (2011) <sup>14</sup> | Compost and Liquid Fertilizer | Various         |
| <b>Median</b>           | <b>65%</b>              | <b>17%</b>              | <b>94%</b>              | <b>-</b>                          | <b>-</b>                      | <b>-</b>        |
| <b>Average</b>          | <b>65%</b>              | <b>17%</b>              | <b>94%</b>              | <b>-</b>                          | <b>-</b>                      | <b>-</b>        |

<sup>a</sup> Average, minimum and maximum end-product recycled to arable land



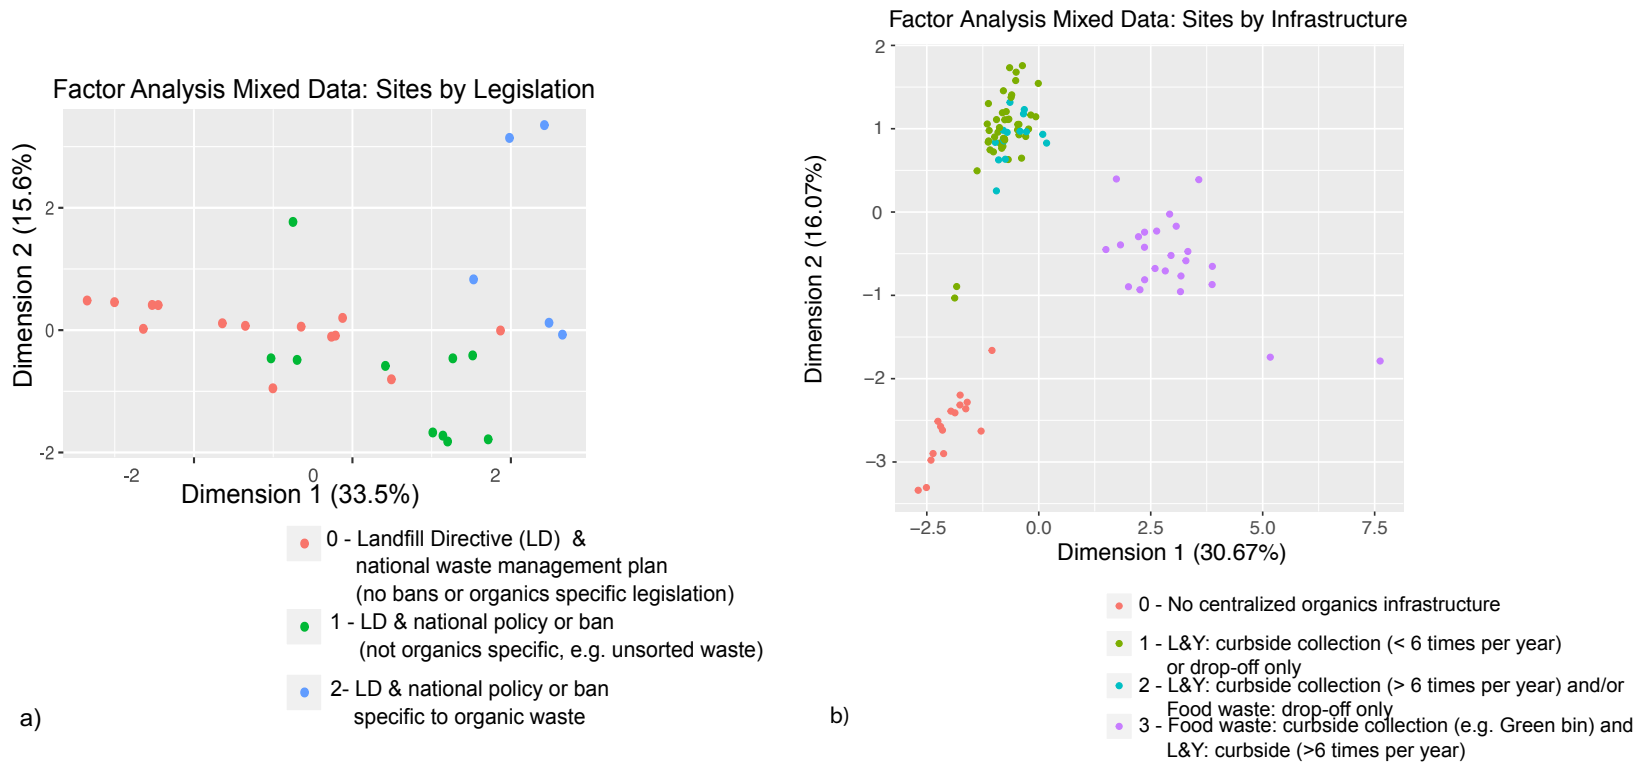

Figure S1. Categorical data factor analysis of mixed data (FAMD):  
 (a) Detailed categorical data for Europe; sites (countries) are plotted and coded by legislation type implemented. (b) Detailed categorical data for Ontario; sites are plotted and coded by infrastructure implemented. The figures show (a) the clustering of countries based on legislative level and (b) the clustering of regions based on infrastructure level.

## DATA AND SOURCES FOR ORGANIC WASTE DIVERSION AND KEY FACTORS

*This appendix has been included to allow access to the data used in the analysis as well as provide insight into the data sources that were used. Comments within the Excel documents provide details on data sources.*

Table S5: European summary of organic waste diversion and factor data.

| EU Landfill Directive Information |           |                  | Organic Waste Diversion*                        |      |          |                                                   |      |          | Socio-Economic          |                                       |                                       |                                                   | Landfill Tax and Fee                |                                 |                                                    |                                | Incineration Tax and Fee                     |                                            |                                |                                              | Legislation National (or subnational)   |                             | Infrastructure                                        |  |
|-----------------------------------|-----------|------------------|-------------------------------------------------|------|----------|---------------------------------------------------|------|----------|-------------------------|---------------------------------------|---------------------------------------|---------------------------------------------------|-------------------------------------|---------------------------------|----------------------------------------------------|--------------------------------|----------------------------------------------|--------------------------------------------|--------------------------------|----------------------------------------------|-----------------------------------------|-----------------------------|-------------------------------------------------------|--|
| Lanfill Bans                      | Base Year | Diversion Year 2 | Organic Diversion of Total Waste (fractional %) |      |          | Organic Diversion of Organic Waste (fractional %) |      |          | GDP per Capita (€) 2011 | Median Income (International \$) 2011 | Median Income (International \$) 2004 | Population Density (people/km <sup>2</sup> ) 2004 | Typical landfill tax (€/tonne) 2012 | Typical gate fee (€/tonne) 2012 | Typical landfill charge (tax + fee) (€/tonne) 2012 | Incineration tax(€/tonne) 2012 | Typical incineration gate fee (€/tonne) 2012 | Typical Incineration charge (€/tonne) 2012 | Incineration tax (0=no, 1=yes) | Economic incentive (e.g. PAYT) (0=no, 1=yes) | Legislation - Organic Waste (scale 0-2) | Incineration Ban (0=n, 1=y) | Mandatory separate collection of biowastes (0=n, 1=y) |  |
|                                   |           |                  | BY                                              | DY2  | Δ BY-DY2 | BY                                                | DY2  | Δ BY-DY2 |                         |                                       |                                       |                                                   |                                     |                                 |                                                    |                                |                                              |                                            |                                |                                              |                                         |                             |                                                       |  |
| Austria                           | 1995      | 2009             | 0.27                                            | 0.32 | 0.05     | 0.60                                              | 0.70 | 0.10     | 29553                   | 27899                                 | 20780                                 | 97                                                | 26                                  | 70                              | 96.00                                              | 8 + 18 residue                 | 125                                          | 151.00                                     | 1                              | 1                                            | 2                                       | 0                           | 1                                                     |  |
| Belgium                           | 1995      | 2009             | 0.08                                            | 0.21 | 0.14     | 0.17                                              | 0.48 | 0.30     | 28664                   | 24493                                 | 18313                                 | 344                                               | 65                                  | 50                              | 118.00                                             | 7.66                           | 110                                          | 117.66                                     | 1                              | 1                                            | 1                                       | 0                           | 0                                                     |  |
| Bulgaria                          | 1995      | 2013             | 0.00                                            | 0.03 | 0.03     | 0.00                                              | 0.14 | 0.14     | 2727                    | 8737                                  | NA                                    | 70                                                | 3                                   | 12.5                            | 15.50                                              | 0                              | NA                                           | NA                                         | 0                              | 0                                            | 0                                       | 0                           | 0                                                     |  |
| Croatia                           | 1997      | 2016             | 0.00                                            | NA   | NA       | 0.00                                              | NA   | NA       | 7767                    | 10595                                 | NA                                    | 76                                                | NA                                  | NA                              | NA                                                 | 0                              | 0                                            | NA                                         | 0                              | 0                                            | 2                                       | 0                           | 0                                                     |  |
| Cyprus                            |           |                  | 0.00                                            | NA   | NA       | 0.00                                              | NA   | NA       | 19023                   | 27615                                 | NA                                    | 80                                                | NA                                  | NA                              | NA                                                 | NA                             | NA                                           | NA                                         | NA                             | NA                                           | NA                                      | NA                          | NA                                                    |  |
| Czech Republic                    | 1995      | 2013             | 0.00                                            | 0.03 | 0.03     | 0.00                                              | 0.07 | 0.07     | 9403                    | 14449                                 | NA                                    | 132                                               | 20                                  | 16                              | 36.00                                              | 0?                             | 46                                           | 46.00                                      | 0                              | 1                                            | 0                                       | 0                           | 0                                                     |  |
| Denmark                           | 1995      | 2009             | 0.11                                            | 0.19 | 0.08     | 0.44                                              | 0.75 | 0.32     | 37435                   | 24575                                 | 18799                                 | 125                                               | 63                                  | 44                              | 107.00                                             | 44                             | 36                                           | 80.00                                      | 1                              | 1                                            | 1                                       | 0                           | 0                                                     |  |
| Estonia                           | 1995      | 2013             | 0.01                                            | 0.05 | 0.05     | 0.01                                              | 0.12 | 0.10     | 7125                    | 10505                                 | 5939                                  | 31                                                | 20.7                                | 40                              | 60.70                                              | 0                              | 0                                            | NA                                         | 0                              | 1                                            | 1                                       | 0                           | 0                                                     |  |
| Finland                           | 1995      | 2009             | 0.08                                            | 0.12 | 0.04     | 0.17                                              | 0.26 | 0.10     | 30312                   | 24404                                 | 17317                                 | 17                                                | 30                                  | 59.4                            | 89.40                                              | 0                              | ?                                            | NA                                         | 0                              | 1                                            | 1                                       | 0                           | 0                                                     |  |
| France                            | 1995      | 2009             | 0.09                                            | 0.17 | 0.08     | 0.26                                              | 0.48 | 0.22     | 27358                   | 27180                                 | 18350                                 | 99                                                | 20                                  | 60.5                            | 80.50                                              | 11.2                           | 99                                           | 110.20                                     | 1                              | 1                                            | 1                                       | 0                           | 0                                                     |  |
| Germany                           | 1995      | 2009             | 0.13                                            | 0.17 | 0.04     | 0.37                                              | 0.49 | 0.12     | 27517                   | 25812                                 | NA                                    | 231                                               | 0                                   | 140                             | 140.00                                             | 0                              | 174                                          | 174.00                                     | 0                              | 1                                            | 2                                       | 0                           | 0                                                     |  |
| Greece                            | 1995      | 2013             | 0.00                                            | 0.04 | 0.04     | 0.00                                              | 0.07 | 0.07     | 17683                   | 16862                                 | 13433                                 | 84                                                | 0                                   | 23.5                            | 23.50                                              | 0                              | 0                                            | NA                                         | 0                              | 0                                            | 0                                       | 0                           | 0                                                     |  |
| Hungary                           | 1995      | 2009             | 0.00                                            | 0.02 | 0.02     | 0.01                                              | 0.08 | 0.07     | 8261                    | 9926                                  | NA                                    | 109                                               | 0                                   | 35                              | 35.00                                              | na                             | na                                           | na                                         | 0                              | 1                                            | 1                                       | 0                           | 0                                                     |  |
| Iceland                           | 1995      | 2013             | 0.02                                            | 0.07 | 0.05     | 0.05                                              | 0.20 | 0.15     | 37795                   | 23477                                 | 20379                                 | 3                                                 | 0                                   | 50                              | 50.00                                              | 0                              | 0                                            | na                                         | 0                              | 1                                            | 0                                       | 0                           | 0                                                     |  |
| Ireland                           | 1995      | 2013             | 0.00                                            | 0.06 | 0.06     | 0.00                                              | 0.23 | 0.23     | 38370                   | 24059                                 | 19043                                 | 60                                                | 50?                                 | 70                              | 120.00                                             | 0                              | 87.5                                         | 87.50                                      | 0                              | 1                                            | 2                                       | 1                           | 1                                                     |  |
| Italy                             | 2003      | 2011             | 0.04                                            | 0.13 | 0.08     | 0.17                                              | 0.36 | 0.19     | 25119                   | 21773                                 | 17481                                 | 196                                               | 30                                  | 90                              | 120.00                                             | 0                              | 125                                          | 125.00                                     | 0                              | 1                                            | 1                                       | 0                           | 1                                                     |  |
| Latvia                            | 1995      | 2013             | 0.00                                            | 0.06 | 0.06     | 0.00                                              | 0.26 | 0.26     | 5153                    | 12642                                 | NA                                    | 36                                                | 8                                   | 30                              | 38.00                                              | na                             | na                                           | NA                                         | 0                              | 0                                            | 0                                       | 0                           | 0                                                     |  |
| Lithuania                         | 2000      | 2013             | 0.00                                            | 0.07 | 0.07     | 0.00                                              | 0.37 | 0.37     | 5400                    | 8669                                  | NA                                    | 54                                                | 22                                  | 16.25                           | 38.25                                              | 0                              | 0                                            | NA                                         | 0                              | 1                                            | 0                                       | 0                           | 0                                                     |  |
| Luxembourg                        | 1995      | 2009             | 0.07                                            | 0.20 | 0.13     | 0.16                                              | 0.44 | 0.28     | 60382                   | 36930                                 | 34082                                 | 177                                               | 0                                   | 149                             | 149.00                                             | 0                              | 96.68                                        | 96.68                                      | 0                              | 1                                            | 0                                       | 0                           | 1                                                     |  |
| Malta                             | 1995      | 2013             | 0.23                                            | 0.05 | NA       | 0.32                                              | 0.07 | NA       | 12130                   | 19118                                 | NA                                    | 1218                                              | 0                                   | 20                              | 20.00                                              | na                             | na                                           | NA                                         | 0                              | 0                                            | 0                                       | 0                           | 0                                                     |  |
| Netherlands                       | 1995      | 2009             | 0.24                                            | 0.25 | 0.00     | 0.54                                              | 0.55 | 0.01     | 32179                   | 25779                                 | NA                                    | 482                                               | 107                                 | 25                              | 132.00                                             | 0                              | 95                                           | 95.00                                      | 1                              | 1                                            | 2                                       | 0                           | 1                                                     |  |
| Norway                            | 1995      | 2009             | 0.02                                            | 0.16 | 0.14     | 0.09                                              | 0.78 | 0.69     | 46366                   | 32395                                 | 23709                                 | 15                                                | 60                                  | ?                               | 100.00                                             | 11.5                           | 40                                           | 51.50                                      | 0                              | 1                                            | 2                                       | 1                           | 0                                                     |  |
| Poland                            | 1995      | 2013             | 0.02                                            | 0.11 | 0.09     | 0.04                                              | 0.24 | 0.20     | 5365                    | 12036                                 | NA                                    | 122                                               | 26.6                                | 69.5                            | 96.10                                              | 0                              | 130                                          | 130.00                                     | 0                              | 1                                            | 0                                       | 0                           | 1                                                     |  |
| Portugal                          | 1995      | 2013             | 0.13                                            | 0.13 | 0.00     | 0.23                                              | 0.23 | 0.00     | 14534                   | 14900                                 | 11711                                 | 114                                               | 3.5                                 | 10.5                            | 14.00                                              | 1.33                           | 25                                           | 26.33                                      | 1                              | 1                                            | 0                                       | 0                           | 0                                                     |  |
| Romania                           | 1995      | 2013             | 0.00                                            | 0.00 | 0.00     | 0.00                                              | 0.01 | 0.01     | 2862                    | 5060                                  | NA                                    | 94                                                | 0                                   | 3.7                             | 3.70                                               | na                             | na                                           | NA                                         | 0                              | 0                                            | 0                                       | 0                           | 0                                                     |  |
| Slovakia                          | 1995      | 2013             | 0.00                                            | 0.07 | 0.07     | 0.02                                              | 0.13 | 0.11     | 6460                    | 12193                                 | NA                                    | 110                                               | 0                                   | 6.8                             | 6.80                                               | 0                              | na                                           | NA                                         | 0                              | 1                                            | 1                                       | 1                           | 0                                                     |  |
| Slovenia                          | 1995      | 2009             | 0.00                                            | 0.02 | 0.02     | 0.01                                              | 0.09 | 0.08     | 13889                   | 19106                                 | NA                                    | 99                                                | 11                                  | 105                             | 116.00                                             | NA                             | NA                                           | 113.00                                     | 0                              | 1                                            | 0                                       | 0                           | 0                                                     |  |
| Spain                             | 1995      | 2009             | 0.00                                            | 0.18 | 0.18     | 0.00                                              | 0.40 | 0.40     | 20069                   | 20793                                 | 14749                                 | 85                                                | 21                                  | 33                              | 54.00                                              | 16.5                           | 57                                           | 73.50                                      | 1                              | 1                                            | 0                                       | 0                           | 1                                                     |  |
| Sweden                            | 1995      | 2009             | 0.06                                            | 0.13 | 0.07     | 0.18                                              | 0.36 | 0.19     | 34184                   | 25003                                 | 17480                                 | 22                                                | 49                                  | 106.5                           | 155.50                                             | 8.6                            | 20                                           | 28.60                                      | 1                              | 1                                            | 1                                       | 0                           | 0                                                     |  |
| Switzerland                       | 1985      | 2009             | 0.06                                            | 0.17 | 0.11     | 0.23                                              | 0.68 | 0.45     | 42897                   | 34398                                 | NA                                    | 185                                               | 12                                  | NA                              | NA                                                 | NA                             | 115.00                                       | 0                                          | 1                              | 1                                            | 0                                       | 1                           |                                                       |  |
| Turkey                            | 1995      | 2017             | 0.01                                            | NA   | NA       | 0.02                                              | NA   | NA       | NA                      | NA                                    | NA                                    | NA                                                | NA                                  | NA                              | NA                                                 | NA                             | NA                                           | NA                                         | NA                             | NA                                           | NA                                      | NA                          | NA                                                    |  |
| United Kingdom                    | 1995      | 2013             | 0.00                                            | 0.16 | 0.16     | 0.00                                              | 0.46 | 0.46     | 30829                   | 23488                                 | NA                                    | 247                                               | 64.4                                | 26.8                            | 91.20                                              | 0                              | 87.5                                         | 87.50                                      | 0                              | 1                                            | 0                                       | 0                           | 0                                                     |  |

\*Eurostat data was extracted in 2015 and early 2016, meaning some values might not match with current web values as some historical values were subsequently updated in May of 2016

Table S6: European waste composition data. Percent of municipal solid waste stream composed of organics.

|                               | <b><u>Municipal Waste Stream Composition: Fractional</u></b> |                        |                          |                |
|-------------------------------|--------------------------------------------------------------|------------------------|--------------------------|----------------|
|                               | <b><u>Percentage of Organic Waste</u></b>                    |                        |                          |                |
|                               | <b>Source: EEA</b>                                           | <b>Source: Eunomia</b> |                          | <b>Average</b> |
|                               |                                                              | <i>Table 5: Barth</i>  | <i>Table 5: Amlinger</i> |                |
| European Union (28 countries) | 0.35                                                         | NA                     | NA                       | 0.35           |
| European Union (27 countries) | 0.35                                                         | 0.32                   | NA                       | 0.34           |
| Austria                       | 0.45                                                         | NA                     | NA                       | 0.45           |
| Belgium                       | 0.45                                                         | 0.46                   | 0.46                     | 0.46           |
| Bulgaria                      | 0.25                                                         | NA                     | NA                       | 0.25           |
| Croatia                       | 0.42                                                         | NA                     | NA                       | 0.42           |
| Cyprus                        | 0.35                                                         | NA                     | NA                       | 0.35           |
| Czech Republic                | 0.45                                                         | NA                     | NA                       | 0.45           |
| Denmark                       | 0.25                                                         | 0.37                   | 0.37                     | 0.33           |
| Estonia                       | 0.45                                                         | NA                     | NA                       | 0.45           |
| Finland                       | 0.45                                                         | 0.35                   | 0.35                     | 0.38           |
| France                        | 0.35                                                         | 0.29                   | 0.29                     | 0.31           |
| Germany                       | 0.35                                                         | 0.32                   | 0.32                     | 0.33           |
| Greece                        | 0.55                                                         | 0.49                   | 0.49                     | 0.51           |
| Hungary                       | 0.25                                                         | NA                     | NA                       | 0.25           |
| Iceland                       | 0.35                                                         | NA                     | NA                       | 0.35           |
| Ireland                       | 0.25                                                         | 0.29                   | 0.29                     | 0.28           |
| Italy                         | 0.35                                                         | 0.33                   | 0.33                     | 0.34           |
| Latvia                        | 0.25                                                         | NA                     | NA                       | 0.25           |
| Lithuania                     | 0.20                                                         | NA                     | NA                       | 0.20           |
| Luxembourg                    | 0.45                                                         | 0.44                   | 0.44                     | 0.44           |
| Malta                         | 0.70                                                         | NA                     | NA                       | 0.70           |
| Netherlands                   | 0.45                                                         | 0.46                   | 0.38                     | 0.43           |
| Norway                        | 0.20                                                         | NA                     | NA                       | 0.20           |
| Poland                        | 0.45                                                         | NA                     | NA                       | 0.45           |
| Portugal                      | 0.55                                                         | 0.35                   | 0.44                     | 0.45           |
| Romania                       | 0.45                                                         | NA                     | NA                       | 0.45           |
| Slovakia                      | 0.55                                                         | NA                     | NA                       | 0.55           |
| Slovenia                      | 0.20                                                         | NA                     | NA                       | 0.20           |
| Spain                         | 0.45                                                         | 0.44                   | 0.44                     | 0.44           |
| Sweden                        | 0.35                                                         | 0.40                   | 0.25                     | 0.33           |
| Switzerland                   | 0.25                                                         | NA                     | NA                       | 0.25           |
| Turkey                        | 0.35                                                         | NA                     | NA                       | 0.35           |
| United Kingdom                | 0.35                                                         | 0.22                   | 0.21                     | 0.26           |

Table S7: European per capita waste diversion and generation.

| Country        | Organic Waste Diversion<br>(of total organic waste)<br>(fractional %) |      | Per capita organic waste<br>diverted (kg) |     | Per capita total waste<br>generated (kg) |     |
|----------------|-----------------------------------------------------------------------|------|-------------------------------------------|-----|------------------------------------------|-----|
|                | BY                                                                    | DY2  | BY                                        | DY2 | BY                                       | DY2 |
| Austria        | 0.60                                                                  | 0.70 | 118                                       | 186 | 437                                      | 590 |
| Belgium        | 0.17                                                                  | 0.48 | 36                                        | 100 | 455                                      | 467 |
| Bulgaria       | 0.00                                                                  | 0.14 | 0                                         | 15  | 694                                      | 432 |
| Czech Republic | 0.00                                                                  | 0.07 | 0                                         | 9   | 302                                      | 307 |
| Denmark        | 0.44                                                                  | 0.75 | 57                                        | 130 | 521                                      | 693 |
| Estonia        | 0.01                                                                  | 0.12 | 2                                         | 15  | 371                                      | 293 |
| Finland        | 0.17                                                                  | 0.26 | 31                                        | 57  | 413                                      | 480 |
| France         | 0.26                                                                  | 0.48 | 43                                        | 89  | 475                                      | 535 |
| Germany        | 0.37                                                                  | 0.49 | 82                                        | 102 | 623                                      | 592 |
| Greece         | 0.00                                                                  | 0.07 | 3                                         | 19  | 339                                      | 509 |
| Hungary        | 0.01                                                                  | 0.08 | 2                                         | 9   | 460                                      | 430 |
| Iceland        | 0.05                                                                  | 0.20 | 7                                         | 26  | 426                                      | 345 |
| Ireland        | 0.00                                                                  | 0.23 | 0                                         | 34  | 512                                      | 586 |
| Italy          | 0.17                                                                  | 0.36 | 31                                        | 67  | 524                                      | 529 |
| Latvia         | 0.00                                                                  | 0.26 | 0                                         | 20  | 264                                      | 312 |
| Lithuania      | 0.00                                                                  | 0.37 | 0                                         | 32  | 365                                      | 433 |
| Luxembourg     | 0.16                                                                  | 0.44 | 41                                        | 135 | 587                                      | 679 |
| Malta          | 0.32                                                                  | 0.07 | 53                                        | 29  | 395                                      | 582 |
| Netherlands    | 0.54                                                                  | 0.55 | 130                                       | 145 | 539                                      | 589 |
| Norway         | 0.09                                                                  | 0.78 | 12                                        | 74  | 624                                      | 470 |
| Poland         | 0.04                                                                  | 0.24 | 5                                         | 32  | 285                                      | 297 |
| Portugal       | 0.23                                                                  | 0.23 | 30                                        | 57  | 352                                      | 440 |
| Romania        | 0.00                                                                  | 0.01 | 0                                         | 23  | 342                                      | 254 |
| Slovakia       | 0.02                                                                  | 0.13 | 4                                         | 13  | 295                                      | 304 |
| Slovenia       | 0.01                                                                  | 0.09 | 2                                         | 10  | 596                                      | 524 |
| Spain          | 0.00                                                                  | 0.40 | 0                                         | 97  | 510                                      | 542 |
| Sweden         | 0.18                                                                  | 0.36 | 24                                        | 60  | 386                                      | 470 |
| Switzerland    | 0.23                                                                  | 0.68 | 31                                        | 120 | 528                                      | 702 |
| United Kingdom | 0.00                                                                  | 0.46 | 0                                         | 76  | 498                                      | 482 |

Table S8: European waste diversion data by EU Landfill Directive target year.

|                | Organics diverted of total waste |      |      |      |          |          | Organic diversion of total organics |      |      |      |          |          |
|----------------|----------------------------------|------|------|------|----------|----------|-------------------------------------|------|------|------|----------|----------|
|                | Base Year                        | DY1  | DY2  | DY3  | Δ BY-DY2 | Δ BY-DY3 | Base Year                           | DY1  | DY2  | DY3  | Δ BY-DY2 | Δ BY-DY3 |
|                | (fractional %)                   |      |      |      |          |          | (fractional %)                      |      |      |      |          |          |
| Austria        | 0.27                             | 0.38 | 0.32 | 0.34 | 0.05     | 0.07     | 0.60                                | 0.85 | 0.70 | 0.75 | 0.10     | 0.15     |
| Belgium        | 0.08                             | 0.23 | 0.21 | 0.21 | 0.14     | 0.13     | 0.17                                | 0.51 | 0.48 | 0.46 | 0.30     | 0.29     |
| Bulgaria       | 0.00                             | 0.00 | 0.03 | NA   | 0.03     | NA       | 0.00                                | 0.00 | 0.14 | NA   | 0.14     | NA       |
| Croatia        | 0.00                             | 0.02 | NA   | NA   | NA       | NA       | 0.00                                | 0.04 | NA   | NA   | NA       | NA       |
| Cyprus?        | 0.00                             | NA   | NA   | NA   | NA       | NA       | 0.00                                | NA   | NA   | NA   | NA       | NA       |
| Czech Republic | 0.00                             | 0.02 | 0.03 | NA   | 0.03     | NA       | 0.00                                | 0.05 | 0.07 | NA   | 0.07     | NA       |
| Denmark        | 0.11                             | 0.19 | 0.19 | 0.15 | 0.08     | 0.04     | 0.44                                | 0.76 | 0.75 | 0.61 | 0.32     | 0.17     |
| Estonia        | 0.01                             | 0.08 | 0.05 | NA   | 0.05     | NA       | 0.01                                | 0.18 | 0.12 | NA   | 0.10     | NA       |
| Finland        | 0.08                             | 0.08 | 0.12 | 0.12 | 0.04     | 0.04     | 0.17                                | 0.17 | 0.26 | 0.26 | 0.10     | 0.09     |
| France         | 0.09                             | 0.14 | 0.17 | 0.17 | 0.08     | 0.08     | 0.26                                | 0.40 | 0.48 | 0.47 | 0.22     | 0.22     |
| Germany        | 0.13                             | 0.16 | 0.17 | 0.18 | 0.04     | 0.05     | 0.37                                | 0.47 | 0.49 | 0.51 | 0.12     | 0.13     |
| Greece         | 0.00                             | 0.02 | 0.04 | NA   | 0.04     | NA       | 0.00                                | 0.04 | 0.07 | NA   | 0.07     | NA       |
| Hungary        | 0.00                             | 0.01 | 0.02 | 0.05 | 0.02     | 0.05     | 0.01                                | 0.05 | 0.08 | 0.18 | 0.07     | 0.17     |
| Iceland        | 0.02                             | 0.08 | 0.07 | NA   | 0.05     | NA       | 0.05                                | 0.24 | 0.20 | NA   | 0.15     | NA       |
| Ireland        | 0.00                             | 0.04 | 0.06 | NA   | 0.06     | NA       | 0.00                                | 0.15 | 0.23 | NA   | 0.23     | NA       |
| Italy          | 0.04                             | 0.10 | 0.13 | NA   | 0.08     | NA       | 0.17                                | 0.27 | 0.36 | NA   | 0.19     | NA       |
| Latvia         | 0.00                             | 0.01 | 0.06 | NA   | 0.06     | NA       | 0.00                                | 0.02 | 0.26 | NA   | 0.26     | NA       |
| Lithuania      | 0.00                             | 0.02 | 0.07 | NA   | 0.07     | NA       | 0.00                                | 0.08 | 0.37 | NA   | 0.37     | NA       |
| Luxembourg     | 0.07                             | 0.18 | 0.20 | 0.20 | 0.13     | 0.13     | 0.16                                | 0.39 | 0.44 | 0.44 | 0.28     | 0.28     |
| Malta          | 0.23                             | 0.00 | 0.05 | NA   | NA       | NA       | 0.32                                | 0.00 | 0.07 | NA   | NA       | NA       |
| Netherlands    | 0.24                             | 0.24 | 0.25 | 0.26 | 0.00     | 0.01     | 0.54                                | 0.53 | 0.55 | 0.57 | 0.01     | 0.03     |
| Norway         | 0.02                             | 0.14 | 0.16 | 0.14 | 0.14     | 0.12     | 0.09                                | 0.68 | 0.78 | 0.70 | 0.69     | 0.60     |
| Poland         | 0.02                             | 0.07 | 0.11 | NA   | 0.09     | NA       | 0.04                                | 0.15 | 0.24 | NA   | 0.20     | NA       |
| Portugal       | 0.13                             | 0.06 | 0.13 | NA   | 0.00     | NA       | 0.23                                | 0.11 | 0.23 | NA   | 0.00     | NA       |
| Romania        | 0.00                             | 0.00 | 0.00 | NA   | 0.00     | NA       | 0.00                                | 0.00 | 0.01 | NA   | 0.01     | NA       |
| Slovakia       | 0.00                             | 0.05 | 0.07 | NA   | 0.07     | NA       | 0.02                                | 0.10 | 0.13 | NA   | 0.11     | NA       |
| Slovenia       | 0.00                             | 0.01 | 0.02 | 0.06 | 0.02     | 0.05     | 0.01                                | 0.07 | 0.09 | 0.28 | 0.08     | 0.27     |
| Spain          | 0.00                             | 0.17 | 0.18 | 0.10 | 0.18     | 0.10     | 0.00                                | 0.38 | 0.40 | 0.23 | 0.40     | 0.23     |
| Sweden         | 0.06                             | 0.12 | 0.13 | 0.14 | 0.07     | 0.08     | 0.18                                | 0.34 | 0.36 | 0.41 | 0.19     | 0.24     |
| Switzerland    | 0.06                             | 0.06 | 0.17 | 0.15 | 0.11     | 0.09     | 0.23                                | 0.25 | 0.68 | 0.61 | 0.45     | 0.38     |
| Turkey?        | 0.01                             | NA   | NA   | NA   | NA       | NA       | 0.02                                | NA   | NA   | NA   | NA       | NA       |
| United Kingdom | 0.00                             | 0.15 | 0.16 | NA   | 0.16     | NA       | 0.00                                | 0.43 | 0.46 | NA   | 0.46     | NA       |

Insufficient data

Table S9: European rate of organic waste diversion as a proportion of organic waste generation by calendar year.

|                      | Comp%Organic | 1985 | 1990 | 1993 | 1995 | 1996 | 1997 | 1998 | 1999 | 2000 | 2001 | 2002 | 2003 | 2004 | 2005 | 2006 | 2007 | 2008 | 2009 | 2010 | 2011 | 2012 | 2013 |
|----------------------|--------------|------|------|------|------|------|------|------|------|------|------|------|------|------|------|------|------|------|------|------|------|------|------|
| Austria              | 45%          | NA   | NA   | NA   | 0.60 | 0.91 | 0.92 | 0.91 | 0.89 | 0.87 | 0.89 | 0.88 | 0.93 | 0.84 | 0.84 | 0.85 | 0.75 | 0.75 | 0.70 | 0.72 | 0.73 | 0.75 | 0.74 |
| Belgium              | 45%          | NA   | NA   | NA   | 0.17 | 0.24 | 0.36 | 0.40 | 0.44 | 0.50 | 0.47 | 0.48 | 0.51 | 0.53 | 0.51 | 0.51 | 0.52 | 0.48 | 0.48 | 0.48 | 0.46 | 0.46 | 0.46 |
| Bulgaria             | 25%          | NA   | NA   | NA   | 0.00 | 0.00 | 0.00 | 0.00 | 0.00 | 0.00 | 0.00 | 0.00 | 0.00 | 0.00 | 0.00 | 0.00 | 0.00 | 0.00 | 0.00 | 0.00 | 0.09 | 0.11 | 0.14 |
| Croatia              | 42%          | NA   | NA   | NA   | NA   | NA   | 0.00 | NA   | 0.02 | 0.02 | 0.02 | 0.02 | 0.02 | 0.04 | 0.04 |
| Cyprus               | 35%          | NA   | NA   | NA   | 0.00 | 0.00 | 0.00 | 0.00 | 0.00 | 0.00 | 0.00 | 0.00 | 0.00 | 0.00 | 0.00 | 0.00 | 0.00 | 0.00 | 0.00 | 0.13 | 0.24 | 0.29 | 0.26 |
| Czech Republic       | 45%          | NA   | NA   | NA   | 0.00 | 0.00 | 0.00 | 0.00 | 0.01 | 0.01 | 0.01 | 0.01 | 0.01 | 0.01 | 0.01 | 0.02 | 0.02 | 0.03 | 0.04 | 0.05 | 0.05 | 0.06 | 0.07 |
| Denmark              | 25%          | NA   | NA   | NA   | 0.44 | 0.50 | 0.57 | 0.54 | 0.58 | 0.64 | 0.55 | 0.64 | 0.66 | 0.71 | 0.72 | 0.76 | 0.77 | 0.60 | 0.75 | 0.77 | 0.58 | 0.61 | 0.66 |
| Estonia              | 45%          | NA   | NA   | NA   | 0.01 | 0.00 | 0.00 | 0.00 | 0.00 | 0.01 | 0.05 | 0.02 | 0.03 | 0.03 | 0.04 | 0.10 | 0.06 | 0.12 | 0.21 | 0.18 | 0.19 | 0.11 | 0.12 |
| Finland              | 45%          | NA   | NA   | NA   | NA   | 0.17 | 0.17 | 0.17 | 0.17 | 0.17 | 0.17 | 0.17 | 0.17 | 0.17 | 0.17 | 0.17 | 0.21 | 0.19 | 0.26 | 0.29 | 0.29 | 0.26 | 0.30 |
| France               | 35%          | NA   | NA   | NA   | 0.26 | 0.27 | 0.28 | 0.29 | 0.30 | 0.33 | 0.35 | 0.37 | 0.37 | 0.39 | 0.39 | 0.40 | 0.42 | 0.46 | 0.48 | 0.49 | 0.47 | 0.47 | 0.48 |
| Germany (until 1994) | 35%          | NA   | NA   | NA   | 0.37 | 0.39 | 0.39 | 0.41 | 0.38 | 0.41 | 0.42 | 0.41 | 0.42 | 0.46 | 0.47 | 0.47 | 0.46 | 0.48 | 0.49 | 0.48 | 0.48 | 0.51 | 0.50 |
| Greece               | 55%          | NA   | NA   | NA   | NA   | 0.00 | 0.01 | 0.01 | 0.01 | 0.01 | 0.01 | 0.01 | 0.00 | 0.00 | 0.01 | 0.03 | 0.04 | 0.04 | 0.01 | 0.04 | 0.06 | 0.07 | 0.07 |
| Hungary              | 25%          | NA   | NA   | NA   | NA   | 0.01 | 0.02 | 0.01 | 0.01 | 0.01 | 0.01 | 0.04 | 0.04 | 0.03 | 0.04 | 0.05 | 0.06 | 0.07 | 0.08 | 0.15 | 0.19 | 0.18 | 0.20 |
| Iceland              | 35%          | NA   | NA   | NA   | 0.05 | 0.05 | 0.05 | 0.05 | 0.05 | 0.07 | 0.06 | 0.06 | 0.06 | NA   | NA   | NA   | NA   | 0.07 | 0.15 | 0.24 | 0.22 | 0.19 | 0.20 |
| Ireland              | 25%          | NA   | NA   | NA   | 0.00 | 0.00 | 0.00 | 0.01 | 0.00 | 0.03 | 0.03 | 0.05 | 0.05 | 0.07 | 0.06 | 0.06 | 0.09 | 0.13 | 0.12 | 0.15 | 0.22 | 0.23 | 0.23 |
| Italy                | 35%          | NA   | NA   | NA   | 0.03 | 0.05 | 0.06 | 0.08 | 0.08 | 0.12 | 0.17 | 0.16 | 0.17 | 0.18 | 0.20 | 0.21 | 0.23 | 0.27 | 0.31 | 0.35 | 0.36 | 0.41 | 0.42 |
| Latvia               | 25%          | NA   | NA   | NA   | 0.00 | 0.00 | 0.00 | 0.00 | 0.00 | 0.00 | 0.02 | 0.00 | 0.01 | 0.04 | 0.01 | 0.02 | 0.02 | 0.03 | 0.01 | 0.02 | 0.04 | 0.08 | 0.26 |
| Lithuania            | 20%          | NA   | NA   | NA   | 0.00 | 0.00 | 0.00 | 0.00 | 0.00 | 0.00 | 0.00 | 0.00 | 0.00 | 0.04 | 0.04 | 0.04 | 0.08 | 0.05 | 0.07 | 0.08 | 0.09 | 0.19 | 0.37 |
| Luxembourg           | 45%          | NA   | NA   | NA   | 0.16 | 0.11 | 0.19 | 0.25 | 0.26 | 0.32 | 0.31 | 0.34 | 0.43 | 0.41 | 0.40 | 0.39 | 0.43 | 0.44 | 0.44 | 0.43 | 0.40 | 0.44 | 0.44 |
| Malta                | 70%          | NA   | NA   | NA   | 0.32 | 0.29 | 0.26 | 0.23 | 0.19 | 0.20 | 0.21 | 0.11 | 0.14 | 0.17 | 0.18 | 0.21 | 0.03 | 0.00 | 0.00 | 0.00 | 0.05 | 0.06 | 0.07 |
| Netherlands          | 45%          | NA   | NA   | NA   | 0.54 | 0.55 | 0.57 | 0.56 | 0.53 | 0.54 | 0.53 | 0.54 | 0.54 | 0.54 | 0.55 | 0.53 | 0.54 | 0.52 | 0.55 | 0.54 | 0.55 | 0.57 | 0.58 |
| Norway               | 20%          | NA   | NA   | NA   | 0.09 | 0.15 | 0.23 | 0.28 | 0.38 | 0.43 | 0.69 | 0.70 | 0.72 | 0.58 | 0.65 | 0.68 | 0.74 | 0.74 | 0.78 | 0.78 | 0.75 | 0.70 | 0.79 |
| Poland               | 45%          | NA   | NA   | NA   | 0.04 | 0.04 | 0.07 | 0.04 | 0.04 | 0.05 | 0.06 | 0.05 | 0.03 | 0.05 | 0.06 | 0.07 | 0.07 | 0.07 | 0.12 | 0.15 | 0.17 | 0.21 | 0.24 |
| Portugal             | 55%          | NA   | NA   | NA   | 0.23 | 0.29 | 0.16 | 0.15 | 0.15 | 0.13 | 0.14 | 0.05 | 0.11 | 0.12 | 0.12 | 0.11 | 0.12 | 0.13 | 0.14 | 0.13 | 0.16 | 0.26 | 0.23 |
| Romania              | 45%          | NA   | NA   | NA   | 0.00 | 0.00 | 0.00 | 0.00 | 0.00 | 0.00 | 0.00 | 0.00 | 0.00 | 0.00 | 0.00 | 0.00 | 0.00 | 0.00 | 0.00 | 0.00 | 0.01 | 0.01 | 0.01 |
| Slovakia             | 55%          | NA   | NA   | NA   | NA   | 0.02 | 0.02 | 0.02 | 0.02 | 0.02 | 0.02 | 0.05 | 0.05 | 0.05 | 0.02 | 0.06 | 0.09 | 0.09 | 0.10 | 0.10 | 0.11 | 0.13 | 0.13 |
| Slovenia             | 20%          | NA   | NA   | NA   | 0.01 | 0.03 | 0.07 | 0.09 | 0.09 | 0.07 | 0.06 | 0.07 | 0.08 | 0.08 | 0.08 | 0.07 | 0.07 | 0.08 | 0.09 | 0.11 | 0.26 | 0.28 | 0.23 |
| Spain                | 45%          | NA   | NA   | NA   | 0.00 | 0.00 | 0.00 | 0.00 | 0.14 | 0.26 | 0.23 | 0.33 | 0.33 | 0.36 | 0.38 | 0.38 | 0.38 | 0.54 | 0.40 | 0.26 | 0.22 | 0.23 | 0.23 |
| Sweden               | 35%          | NA   | NA   | NA   | 0.18 | 0.20 | 0.21 | 0.23 | 0.25 | 0.27 | 0.28 | 0.24 | 0.26 | 0.29 | 0.32 | 0.34 | 0.32 | 0.33 | 0.36 | 0.39 | 0.40 | 0.41 | 0.44 |
| Switzerland          | 25%          | 0.23 | 0.25 | 0.34 | 0.38 | 0.42 | 0.44 | 0.46 | 0.45 | 0.54 | 0.54 | 0.59 | 0.60 | 0.61 | 0.62 | 0.66 | 0.68 | 0.66 | 0.68 | 0.67 | 0.62 | 0.61 | 0.69 |
| Turkey               | 35%          | NA   | NA   | NA   | 0.02 | 0.02 | 0.02 | 0.01 | 0.02 | 0.02 | 0.02 | 0.04 | 0.03 | 0.03 | 0.03 | 0.02 | 0.03 | 0.03 | 0.03 | 0.02 | 0.03 | 0.01 | 0.01 |
| United Kingdom       | 35%          | NA   | NA   | NA   | 0.00 | 0.00 | 0.00 | 0.00 | 0.00 | 0.08 | 0.09 | 0.11 | 0.14 | 0.20 | 0.24 | 0.29 | 0.33 | 0.38 | 0.40 | 0.43 | 0.45 | 0.45 | 0.46 |

Insufficient data

Table S10: Ontario summary of organic waste diversion and factor data.

| Notes | Type | Municipality                                 | CODE  | Organic Diversion                         |      |      | Socio-Economic |                   |                    | Infrastructure                |                      |                       | Landfill Fee    |              | Legislation                                           | Economic Incentive |               |
|-------|------|----------------------------------------------|-------|-------------------------------------------|------|------|----------------|-------------------|--------------------|-------------------------------|----------------------|-----------------------|-----------------|--------------|-------------------------------------------------------|--------------------|---------------|
|       |      |                                              |       | Organic Waste Diverted                    |      |      | Median income  | Population        | Population density | Years since GB implementation | Infrastructure (0-3) | Centralized green bin | Centralized L&Y | Landfill Fee | Landfill Fee Source                                   | Bag Limit          | PAYT          |
|       |      |                                              |       | (fractional % of organic waste generated) |      |      | (CDN \$)       | (Inhabitants/km2) |                    |                               | (scale 0-3)          | (0=no, 1=yes)         | (0=no, 1=yes)   |              |                                                       | (0=no, 1=yes)      | (0=no, 1=yes) |
|       |      |                                              |       | 2006                                      | 2009 | 2013 | 2011           | 2011              | 2011               | as of 2013                    | as of 2013           | as of 2013            | as of 2013      | as of 2016   | as of 2013                                            | as of 2013         | as of 2013    |
|       | TP   | ALFRED AND PLANTAGENET, TOWNSHIP OF          | AP    | 0.01                                      | 0.06 | 0.00 | 28708          | 9196              | 23.4323            | 0                             | 0                    | 0                     | 0               | 90           | <a href="http://www.ru">http://www.ru</a>             | 1                  | 1             |
|       | TP   | AMARANTH, TOWNSHIP OF                        | AMA   | 0.09                                      | 0.30 | 0.36 | 33038          | 3963              | 14.9833            | 6                             | 3                    | 1                     | 1               | 95           | <a href="https://www.a">https://www.a</a>             | 1                  | 1             |
|       | T    | ARNPRIOR, TOWN OF                            | ARN   | 0.26                                      | 0.16 | 0.11 | 28099          | 8114              | 622.182            | 0                             | 1                    | 0                     | 1               | 120          | <a href="http://arnprior">http://arnprior</a>         | 0                  | 1             |
|       | TP   | ATHENS, TOWNSHIP OF                          | ATH   | 0.16                                      | 0.21 | 0.17 | 28852          | 3118              | 24.4033            | 0                             | 0                    | 0                     | 0               | 110          | <a href="http://www.lei">http://www.lei</a>           | 0                  | 1             |
|       | TP   | AUGUSTA, TOWNSHIP OF                         | AUG   | 0.02                                      | 0.09 | 0.00 | 29499          | 7430              | 23.6074            | 0                             | 1                    | 0                     | 1               | 110          | <a href="http://www.au">http://www.au</a>             | 0                  | 0             |
|       | T    | AYLMER, TOWN OF                              | AYL   | 0.33                                      | 0.19 | 0.30 | 24019          | 7151              | 1148.8658          | 0                             | 0                    | 0                     | 0               | 108          | <a href="http://www.m">http://www.m</a>               | 0                  | 1             |
|       | CY   | BARRIE, CITY OF                              | BAR   | 0.30                                      | 0.42 | 0.35 | 30838          | 135711            | 1753.61            | 5                             | 3                    | 1                     | 1               | 145          | <a href="http://www.ba">http://www.ba</a>             | 0                  | 1             |
|       | MU   | BAYHAM, MUNICIPALITY OF                      | BAY   | 0.00                                      | 0.00 | 0.02 | 24411          | 6989              | 28.5               | 0                             | 2                    | 0                     | 1               | 85           | <a href="http://www.ridgelan">http://www.ridgelan</a> | 0                  | 1             |
|       | TP   | BONNECHERE VALLEY, TOWNSHIP OF               | BON   | 0.07                                      | 0.01 | 0.25 | 29814          | 3763              | 6.3437             | 11                            | 3                    | 1                     | 1               | 55           | <a href="http://www.bc">http://www.bc</a>             | 0                  | 1             |
|       | CDR  | BRANT, COUNTY OF                             | BRC   | 0.05                                      | 0.08 | 0.13 | 29093          | 136035            | 124.4              | 0                             | 1                    | 0                     | 1               | 87.5         | <a href="http://www.br">http://www.br</a>             | 1                  | 0             |
|       | CY   | BRANTFORD, CITY OF                           | BRA   | 0.13                                      | 0.20 | 0.28 | 28916          | 93650             | 1292.3231          | 0                             | 1                    | 0                     | 1               | 69           | <a href="http://www.br">http://www.br</a>             | 1                  | 0             |
|       | CY   | BROCKVILLE, CITY OF                          | BROCK | 0.25                                      | 0.39 | 0.27 | 26885          | 21870             | 1046.1862          | 0                             | 1                    | 0                     | 1               | 110          | <a href="http://www.lei">http://www.lei</a>           | 0                  | 1             |
|       | T    | CARLETON PLACE, TOWN OF                      | CAR   | 0.18                                      | 0.18 | 0.27 | 35287          | 9809              | 1110.3188          | 0                             | 1                    | 0                     | 1               | 140          | <a href="http://www.m">http://www.m</a>               | 0                  | 1             |
|       | MU   | CENTRAL ELGIN, MUNICIPALITY OF               | CELG  | 0.00                                      | 0.01 | 0.03 | 31941          | 12743             | 45.4735            | 0                             | 1                    | 0                     | 1               | 108          | <a href="http://www.m">http://www.m</a>               | 0                  | 1             |
|       | MU   | CHATHAM-KENT, MUNICIPALITY OF                | CHK   | 0.27                                      | 0.33 | 0.35 | 26221          | 103671            | 42.1755            | 0                             | 1                    | 0                     | 1               | 102          | <a href="http://www.ch">http://www.ch</a>             | 1                  | 1             |
|       |      | CHIPPEWAS OF RAMA FIRST NATION               | CHI   | 0.00                                      | 0.00 | 0.25 | 20628          | 870               | 81.3               | 1                             | 3                    | 1                     | 1               | 155          | <a href="http://www.sir">http://www.sir</a>           | 1                  | 0             |
|       | CY   | CLARENCE-ROCKLAND, CITY OF                   | CLA   | 0.03                                      | 0.21 | 0.16 | 40242          | 23185             | 77.839             | 0                             | 1                    | 0                     | 1               | 90           | <a href="http://www.ru">http://www.ru</a>             | 1                  | 0             |
|       | TP   | CONMEE, TOWNSHIP OF                          | CON   | 0.00                                      | 0.07 | 0.07 | 26301          | 764               | 4.5257             | 0                             | 0                    | 0                     | 0               | 63.93        | <a href="http://www.th">http://www.th</a>             | 0                  | 0             |
|       | CY   | CORNWALL, CITY OF                            | COR   | 0.06                                      | 0.08 | 0.13 | 24555          | 46340             | 753.2093           | 0                             | 2                    | 0                     | 1               | 70           | <a href="http://www.sir">http://www.sir</a>           | 0                  | 0             |
|       | T    | DEEP RIVER, TOWN OF                          | DRIV  | 0.00                                      | 0.02 | 0.05 | 41949          | 4193              | 82.3772            | 0                             | 1                    | 0                     | 1               | 75           | <a href="http://www.nc">http://www.nc</a>             | 0                  | 0             |
|       | CY   | DRYDEN, CITY OF                              | DRY   | 0.03                                      | 0.02 | 0.02 | 33359          | 7617              | 115.6834           | 0                             | 0                    | 0                     | 0               | 90           | <a href="http://www.dr">http://www.dr</a>             | 0                  | 1             |
|       | CTY  | DUFFERIN, COUNTY OF                          | DUF   | NA                                        | NA   | 0.51 | 33038          | 56881             | 38.3               | 14                            | 3                    | 1                     | 1               | 85           | 519.941.2816 €                                        | 0                  | 1             |
|       | RM   | DURHAM, REGIONAL MUNICIPALITY OF             | DUR   | 0.34                                      | 0.56 | 0.54 | 34966          | 608124            | 241                | 10                            | 3                    | 1                     | 1               | 120          | <a href="http://www.du">http://www.du</a>             | 0                  | 1             |
|       |      | DUTTON-DUNWICH, MUNICIPALITY OF              |       | 0.00                                      | 0.00 | 0.02 | 32121          | 3876              | 13.2               | 0                             | 1                    | 0                     | 1               | 109.27       | <a href="http://www.du">http://www.du</a>             | 0                  | 0             |
|       | TP   | EAST GARAFRAXA, TOWNSHIP OF                  | EGAR  | 0.00                                      | 0.18 | 0.20 | 40645          | 2595              | 15.6284            | 6                             | 3                    | 1                     | 1               | 90           | Based on Muln                                         | 1                  | 1             |
|       | TP   | EAST LUTHER GRAND VALLEY, TOWNSHIP OF        | ELU   | 0.31                                      | 0.49 | 0.59 | 26923          | 2726              | 17.2278            | 14                            | 3                    | 1                     | 1               | 90           | Based on Muln                                         | 0                  | 1             |
|       | T    | ESPANOLA, TOWN OF                            | ESP   | 0.00                                      | 0.00 | 0.02 | 32552          | 5364              | 65.0625            | 0                             | 0                    | 0                     | 0               | 41           | <a href="http://www.es">http://www.es</a>             | 1                  | 0             |
|       | CTY  | ESSEX-WINDSOR SOLID WASTE AUTHORITY          | EW    | 0.22                                      | 0.29 | 0.32 | 28,924         | 388782            | 210.1              | 0                             | 2                    | 0                     | 1               | 64           | <a href="http://www.ev">http://www.ev</a>             | 1                  | 0             |
|       |      | GANANOQUE, TOWN OF                           | GAN   | 0.41                                      | 0.00 | 0.32 | 28319          | 5194              | 740.8              | 0                             | 1                    | 0                     | 1               | 110          | <a href="http://www.lei">http://www.lei</a>           | 1                  | 1             |
|       | TP   | GREATER MADAWASKA, TOWNSHIP OF               | GMAD  | 0.00                                      | 0.00 | 0.01 | 29814          | 2485              | 2.4                | NA                            | NA                   | NA                    | NA              | 80           | <a href="https://www.ti">https://www.ti</a>           | 0                  | 0             |
|       | T    | GREATER NAPANEE, TOWNSHIP OF                 | GNAP  | 0.04                                      | 0.05 | 0.04 | 28217          | 15511             | 33.6241            | 0                             | 1                    | 0                     | 1               | 60           | <a href="http://napanee">http://napanee</a>           | 1                  | 1             |
|       | CV   | GREATER SUDBURY, CITY OF                     | GSUD  | 0.22                                      | 0.30 | 0.35 | 32941          | 160274            | 49.6607            | 4                             | 3                    | 1                     | 1               | 73           | <a href="https://www.g">https://www.g</a>             | 0                  | 1             |
|       |      | GREY HIGHLANDS, MUNICIPALITY OF              | GHIGH | 0.00                                      | 0.00 | 0.02 | 27999          | 9520              | 10.8               | 0                             | 0                    | 0                     | 0               | 200          | <a href="http://www.gr">http://www.gr</a>             | 1                  | 1             |
|       | CY   | GUELPH, CITY OF                              | GUE   | 0.39                                      | 0.40 | 0.82 | 33357          | 121688            | 1395.4374          | 2                             | 3                    | 1                     | 1               | 75           | <a href="http://guelph.c">http://guelph.c</a>         | 0                  | 1             |
|       | CY   | HALDIMAND, COUNTY OF                         | HALD  | 0.03                                      | 0.06 | 0.06 | 30734          | 44876             | 35.8558            | 0                             | 1                    | 0                     | 1               | 119          | <a href="http://www.ha">http://www.ha</a>             | 1                  | 0             |
|       | RM   | HALTON, REGIONAL MUNICIPALITY OF             | HALT  | 0.26                                      | 0.66 | 0.63 | 39662          | 501669            | 520.4              | 7                             | 3                    | 1                     | 1               | 165          | <a href="http://www.ha">http://www.ha</a>             | 1                  | 1             |
|       | C    | HAMILTON, CITY OF                            | HAM   | 0.37                                      | 0.50 | 0.51 | 29399          | 519949            | 465.3918           | 7                             | 3                    | 1                     | 1               | 117.5        | <a href="https://www.h">https://www.h</a>             | 1                  | 0             |
|       | T    | HANOVER, TOWN OF                             | HAN   | 0.00                                      | 0.00 | 0.10 | 26973          | 7490              | 763.8103           | 0                             | 1                    | 0                     | 1               | 110          | <a href="http://www.ha">http://www.ha</a>             | 0                  | 1             |
|       | TP   | HEAD, CLARA AND MARIA, TOWNSHIPS OF          | HCM   | 0.17                                      | 0.02 | 0.12 | 29814          | 235               | 0.3227             | 0                             | 1                    | 0                     | 1               | 85           | <a href="http://www.to">http://www.to</a>             | 0                  | 1             |
|       | MU   | HIGHLANDS EAST, MUNICIPALITY OF              | HIE   | 0.00                                      | 0.01 | 0.01 | 21058          | 3249              | 4.6058             | 0                             | 0                    | 0                     | 0               | 56.61        | <a href="http://www.hij">http://www.hij</a>           | 0                  | 0             |
|       | TP   | HILLIARD, TOWNSHIP OF                        | HIL   | 0.00                                      | 0.01 | 0.00 | 25476          | 204               | 2.2372             | 0                             | 0                    | 0                     | 0               | 11.1         | <a href="https://icreate">https://icreate</a>         | 0                  | 0             |
|       | MU   | HURON EAST, MUNICIPALITY OF                  | HUEA  | NA                                        | NA   | NA   | 30055          | 9264              | 13.8422            | 0                             | 1                    | 0                     | 1               | 90           | <a href="http://www.hu">http://www.hu</a>             | NA                 | NA            |
|       | CY   | KAWARTHA LAKES, CITY OF                      | KAW   | 0.01                                      | 0.03 | 0.23 | 27903          | 73214             | 23.7472            | 0                             | 1                    | 0                     | 1               | 95           | <a href="https://www.c">https://www.c</a>             | 0                  | 1             |
|       |      | KILLALOE, HAGARTY, AND RICHARDS, TOWNSHIP OF | KIL   | 0.00                                      | 0.01 | 0.07 | 29814          | 2402              | 6.066              | 0                             | 2                    | 0                     | 1               | 95           | <a href="http://www.kil">http://www.kil</a>           | 0                  | 1             |
|       | CY   | KINGSTON, CITY OF                            | KING  | 0.35                                      | 0.50 | 0.55 | 31370          | 123363            | 273.4284           | 7                             | 3                    | 1                     | 1               | 104.5        | <a href="http://www.sti">http://www.sti</a>           | 0                  | 1             |
|       | TP   | LANARK HIGHLANDS, TOWNSHIP OF                | LAN   | 0.00                                      | 0.00 | 0.00 | 31960          | 5128              | 4.8922             | 0                             | 0                    | 0                     | 0               | 140          | <a href="http://www.m">http://www.m</a>               | 1                  | 0             |
|       | T    | LAURENTIAN HILLS, TOWN OF                    | LAUR  | 0.10                                      | 0.03 | 0.18 | 33711          | 2811              | 4.3889             | 0                             | 0                    | 0                     | 0               | 75           | <a href="http://www.nc">http://www.nc</a>             | 0                  | 0             |





|     |                                    |      |      |      |      |       |         |           |    |   |   |   |        |                                             |   |   |
|-----|------------------------------------|------|------|------|------|-------|---------|-----------|----|---|---|---|--------|---------------------------------------------|---|---|
| CY  | ST. THOMAS, CITY OF                | STT  | 0.47 | 0.55 | 0.55 | 28770 | 37905   | 1067.2625 | 12 | 3 | 1 | 1 | 108    | <a href="http://www.m">http://www.m</a>     | 0 | 1 |
| CY  | STRATFORD, CITY OF                 | STRA | 0.22 | 0.30 | 0.23 | 32523 | 30886   | 1146.0142 | 0  | 2 | 0 | 1 | 76     | <a href="https://www.s">https://www.s</a>   | 0 | 1 |
| MU  | STRONG, TOWNSHIP OF                | STRO | 0.02 | 0.04 | 0.00 | 30326 | 1341    | 8.4       | 0  | 0 | 0 | 0 | 95     | Average                                     | 0 | 0 |
| MU  | THAMES CENTRE, MUNICIPALITY OF     | THA  | 0.18 | 0.32 | 0.50 | 33205 | 13000   | 30        | 0  | 1 | 0 | 1 | 130    | <a href="http://www.th">http://www.th</a>   | 0 | 1 |
| T   | THE BLUE MOUNTAINS, TOWN OF        | TBM  | 0.24 | 0.25 | 0.22 | 34694 | 6453    | 22.4663   | 0  | 3 | 1 | 1 | 120    | <a href="http://www.th">http://www.th</a>   | 1 | 1 |
| CY  | THUNDER BAY, CITY OF               | THU  | 0.03 | 0.06 | 0.04 | 31182 | 108359  | 330.121   | 0  | 1 | 0 | 1 | 63.93  | <a href="http://www.th">http://www.th</a>   | 1 | 0 |
| C   | TIMMINS, CITY OF                   | TIM  | 0.00 | 0.00 | 0.01 | 31778 | 43165   | 14.5      | 0  | 1 | 0 | 1 | 75     | <a href="http://www.tir">http://www.tir</a> | 1 | 0 |
| C   | TORONTO, CITY OF                   | TOR  | 0.46 | 0.50 | 0.63 | 27371 | 2615060 | 4149.4748 | 11 | 3 | 1 | 1 | 109.27 | <a href="http://www1.t">http://www1.t</a>   | 1 | 1 |
| RM  | WATERLOO, REGIONAL MUNICIPALITY OF | WAT  | 0.37 | 0.54 | 0.61 | 32780 | 507096  | 370       | 7  | 3 | 1 | 1 | 75     | <a href="http://www.re">http://www.re</a>   | 1 | 1 |
| CTY | WELLINGTON, COUNTY OF              | WEL  | 0.01 | 0.03 | 0.08 | 33475 | 208360  | 78.3      | 0  | 0 | 0 | 0 | 75     | <a href="http://www.wi">http://www.wi</a>   | 0 | 1 |
| MU  | WEST ELGIN, MUNICIPALITY OF        | WELG | 0.08 | 0.08 | 0.07 | 23359 | 5157    | 15.9899   | 0  | 1 | 0 | 0 | 108    | <a href="http://www.m">http://www.m</a>     | 0 | 0 |
| MU  | WEST GREY, MUNICIPALITY OF         | WGR  | 0.06 | 0.06 | 0.31 | 27723 | 12286   | 14.0248   | 0  | 1 | 0 | 1 | 130    | <a href="http://www.wi">http://www.wi</a>   | 0 | 1 |
| RM  | YORK, REGIONAL MUNICIPALITY OF     | YOR  | 0.34 | 0.68 | 0.69 | 31341 | 1032524 | 585.9     | 9  | 3 | 1 | 1 | 82.5   | <a href="http://www.yc">http://www.yc</a>   | 1 | 1 |

|                                                                                                                                                               |
|---------------------------------------------------------------------------------------------------------------------------------------------------------------|
| Unreliable data (do not have at least 3 consecutive years of data collection, are lacking at least 1 non-zero diversion value, or are missing factorial data) |
| Region unclear                                                                                                                                                |
| Diversion data (other than 2013) adjusted due to infeasibility                                                                                                |
| 2013 data not available                                                                                                                                       |
| Not included in final FAMD and regression models                                                                                                              |
| Estimated from regional information                                                                                                                           |

Estimated from regional information

Table S11: Ontario municipal contact data collection. Provides contact information by census division (larger regional area) and census subdivision (generally the jurisdiction of interest), along with information gathered through municipal contacts on various explanatory variables.

| Notes | Type | Municipality                                 | Census Division                 | Census Division Contact                                                                                                                                    | Census Subdivision Contact                                                                    | Infrastructure scale (0-3) | Centralized Food Waste (Greenbin) Program (0/1) | Greenbin Start Date (year) | Greenbin full rollout (year) | Centralized L&Y Waste Program (0/1) | L&Y Waste Start Date (year) | Census Division Policy (Notes)                                                                                                                                                                                                                                                                                                     | Census Subdivision Policy (Notes)                                                                                                                                                                                                                                                                                                                                                                                                    |
|-------|------|----------------------------------------------|---------------------------------|------------------------------------------------------------------------------------------------------------------------------------------------------------|-----------------------------------------------------------------------------------------------|----------------------------|-------------------------------------------------|----------------------------|------------------------------|-------------------------------------|-----------------------------|------------------------------------------------------------------------------------------------------------------------------------------------------------------------------------------------------------------------------------------------------------------------------------------------------------------------------------|--------------------------------------------------------------------------------------------------------------------------------------------------------------------------------------------------------------------------------------------------------------------------------------------------------------------------------------------------------------------------------------------------------------------------------------|
|       | TP   | ALFRED AND PLANTAGENET, TOWNSHIP OF          |                                 | Public works: mclermont@prescott-russell.on.ca                                                                                                             | publicworks-travauxpublics@alfred-plantagenet.com                                             | 0                          | 0                                               | NA                         | NA                           | 0                                   | NA                          |                                                                                                                                                                                                                                                                                                                                    | It is noted the Township does not accept organic materials for the purpose of composting at either of the landfill sites. Implementation of a composting program was considered by the Township, but the anticipated quantity of organic materials to be diverted from the landfill were determined inadequate at this time to justify the fees to amend the site Certificate of Approval and establish a composting facility - 2011 |
|       | TP   | AMARANTH, TOWNSHIP OF                        | Prescott and Russell            | dufferinwaste@dufferincounty.ca                                                                                                                            | NA                                                                                            | 3                          | 1                                               | 2007                       | 2007                         | 1                                   | 1993                        | Dufferin county, has a green bin program that has been in full operation since 2007.                                                                                                                                                                                                                                               | Accept L&Y waste ~6 times per year @ landfill -                                                                                                                                                                                                                                                                                                                                                                                      |
|       | T    | ARNPRIOR, TOWN OF                            | Renfrew                         | Ottawa valley waste recovery centre: info@ovwrc.com<br>http://www.leedsgrenville.com/en/govern/contactus/PublicWorksCont                                   | Director of public works: gbougon@arnprior.ca                                                 | 1                          | 0                                               | NA                         | NA                           | 1                                   | NA                          | The OVWRC began operation in January 2002 and is a partnership between the Town of Petawawa, City of Pembroke, Township of Laurentian Valley, Township of North Algona Wilberforce, and Sebastopol Ward of Bonnechere Valley, all located within Renfrew County. - http://www.petawawa.ca/residents/public-works/waste-management/ | L&Y waste 2x per year.                                                                                                                                                                                                                                                                                                                                                                                                               |
|       | TP   | ATHENS, TOWNSHIP OF                          | Leeds and Grenville             | act.asp<br>http://www.leedsgrenville.com/en/govern/contactus/PublicWorksCont                                                                               | Public works: 613.924.2044                                                                    | 0                          | 0                                               | NA                         | NA                           | 0                                   | NA                          |                                                                                                                                                                                                                                                                                                                                    |                                                                                                                                                                                                                                                                                                                                                                                                                                      |
|       | TP   | AUGUSTA, TOWNSHIP OF                         | Leeds and Grenville             | act.asp                                                                                                                                                    | NA                                                                                            | 1                          | 0                                               | NA                         | NA                           | 1                                   | NA                          |                                                                                                                                                                                                                                                                                                                                    |                                                                                                                                                                                                                                                                                                                                                                                                                                      |
|       | T    | AYLMER, TOWN OF                              | Elgin                           | http://www.elgincounty.ca/contact                                                                                                                          | NA                                                                                            | 0                          | 0                                               | NA                         | NA                           | 0                                   | NA                          |                                                                                                                                                                                                                                                                                                                                    |                                                                                                                                                                                                                                                                                                                                                                                                                                      |
|       | CY   | BARRIE, CITY OF                              | Simcoe                          | info@simcoe.ca                                                                                                                                             | NA                                                                                            | 3                          | 1                                               | 2008                       | 2008                         | 1                                   | NA                          | greenbin program                                                                                                                                                                                                                                                                                                                   |                                                                                                                                                                                                                                                                                                                                                                                                                                      |
|       | MU   | BAYHAM, MUNICIPALITY OF                      | Elgin                           | http://www.elgincounty.ca/contact                                                                                                                          | NA                                                                                            | 2                          | 0                                               | NA                         | NA                           | 1                                   | NA                          |                                                                                                                                                                                                                                                                                                                                    |                                                                                                                                                                                                                                                                                                                                                                                                                                      |
|       | TP   | BONNECHERE VALLEY, TOWNSHIP OF               | Renfrew                         | Ottawa valley waste recovery centre: info@ovwrc.com<br>http://www.brant.ca/en/contacts/search.aspx?s=gH6Z2KJdn9kLW97B0syweQuAleQuAl&keyword=Public%20Works | NA                                                                                            | 3                          | 1                                               | 2002                       | 2016                         | 1                                   | 2002                        |                                                                                                                                                                                                                                                                                                                                    | The OVWRC began operation in January 2002 and is a partnership between the Town of Petawawa, City of Pembroke, Township of Laurentian Valley, Township of North Algona Wilberforce, and Sebastopol Ward of Bonnechere Valley, all located within Renfrew County. - http://www.petawawa.ca/residents/public-works/waste-management/                                                                                                   |
|       | CDR  | BRANT, COUNTY OF                             | Brant                           | http://www.brant.ca/en/contacts/search.aspx?s=gH6Z2KJdn9kLW97B0syweQuAleQuAl&keyword=Public%20Works                                                        | NA                                                                                            | 1                          | 0                                               | NA                         | NA                           | 1                                   | 1999                        | no evident policy or infrastructure. L&Y waste three times per year in urban areas, christmas tree collection                                                                                                                                                                                                                      |                                                                                                                                                                                                                                                                                                                                                                                                                                      |
|       | CY   | BRANTFORD, CITY OF                           | Brant                           | http://www.brant.ca/en/contacts/search.aspx?s=gH6Z2KJdn9kLW97B0syweQuAleQuAl&keyword=Public%20Works                                                        | NA                                                                                            | 1                          | 0                                               | NA                         | NA                           | 1                                   | 1999                        | no evident policy or infrastructure. L&Y waste three times per year in urban areas, christmas tree collection                                                                                                                                                                                                                      | L&Y plus Xmas trees                                                                                                                                                                                                                                                                                                                                                                                                                  |
|       | CY   | BROCKVILLE, CITY OF                          | Leeds and Grenville             | act.asp                                                                                                                                                    | NA                                                                                            | 1                          | 0                                               | NA                         | NA                           | 1                                   | 1992                        |                                                                                                                                                                                                                                                                                                                                    |                                                                                                                                                                                                                                                                                                                                                                                                                                      |
|       | T    | CARLETON PLACE, TOWN OF                      | Lanark                          | responsibility of municipality                                                                                                                             | dyoung@carletonplace.ca                                                                       | 1                          | 0                                               | NA                         | NA                           | 1                                   | NA                          |                                                                                                                                                                                                                                                                                                                                    |                                                                                                                                                                                                                                                                                                                                                                                                                                      |
|       | MU   | CENTRAL ELGIN, MUNICIPALITY OF               | Elgin                           | http://www.elgincounty.ca/contact                                                                                                                          | NA                                                                                            | 1                          | 0                                               | NA                         | NA                           | 1                                   | NA                          |                                                                                                                                                                                                                                                                                                                                    | drop off, 1x per week, May-Nov, incl. food scraps                                                                                                                                                                                                                                                                                                                                                                                    |
|       | MU   | CHATHAM-KENT, MUNICIPALITY OF                | Chatham-Kent                    | ckwaste@chatham-kent.ca                                                                                                                                    | NA                                                                                            | 1                          | 0                                               | NA                         | NA                           | 1                                   | 1990                        | No evident policy or infrastructure                                                                                                                                                                                                                                                                                                | l&y waste                                                                                                                                                                                                                                                                                                                                                                                                                            |
|       | FN   | CHIPPEWAS OF RAMA FIRST NATION               | Simcoe                          | info@simcoe.ca                                                                                                                                             | NA                                                                                            | 3                          | 1                                               | 2012                       | NA                           | 1                                   | NA                          | http://www.orilliapacket.com/2011/12/13/rama-ready-to-roll-out-compost-program                                                                                                                                                                                                                                                     |                                                                                                                                                                                                                                                                                                                                                                                                                                      |
|       | CY   | CLARENCE-ROCKLAND, CITY OF                   | Prescott and Russell            | Public works: mclermont@prescott-russell.on.ca                                                                                                             | waste<br>rockland.com/index.php/en/waste                                                      | 1                          | 0                                               | NA                         | NA                           | 1                                   | 2016                        | no evident policy, no evident infrastructure                                                                                                                                                                                                                                                                                       |                                                                                                                                                                                                                                                                                                                                                                                                                                      |
|       | TP   | CONMEE, TOWNSHIP OF                          | Thunder Bay                     | NA                                                                                                                                                         | conmeeroads@tbaytel.net<br>http://survey2.esolutionsgroup.ca/TakeSurvey.aspx?SurveyID=n211n94 | 0                          | 0                                               | NA                         | NA                           | 0                                   | NA                          | NA                                                                                                                                                                                                                                                                                                                                 |                                                                                                                                                                                                                                                                                                                                                                                                                                      |
|       | CY   | CORNWALL, CITY OF                            | Stormont, Dundas and Glengarry  | NA                                                                                                                                                         | NA                                                                                            | 2                          | 0                                               | NA                         | NA                           | 1                                   | NA                          | NA                                                                                                                                                                                                                                                                                                                                 | L&Y and backyard                                                                                                                                                                                                                                                                                                                                                                                                                     |
|       | T    | DEEP RIVER, TOWN OF                          | Renfrew                         | Ottawa valley waste recovery centre: info@ovwrc.com<br>http://www.kenora.ca/cityhall/city-services/waste-recycling/transfer-facility.aspx                  | NA                                                                                            | 1                          | 0                                               | NA                         | NA                           | 1                                   | NA                          |                                                                                                                                                                                                                                                                                                                                    |                                                                                                                                                                                                                                                                                                                                                                                                                                      |
|       | CY   | DRYDEN, CITY OF                              | Kenora                          | facility.aspx                                                                                                                                              | publicworks@dryden.ca                                                                         | 0                          | 0                                               | NA                         | NA                           | 0                                   | NA                          | None                                                                                                                                                                                                                                                                                                                               | None                                                                                                                                                                                                                                                                                                                                                                                                                                 |
|       | CY   | DUFFERIN, COUNTY OF                          | Dufferin                        | dufferinwaste@dufferincounty.ca                                                                                                                            | NA                                                                                            | 3                          | 1                                               | 1999                       | 2007                         | 1                                   | 1993                        | Dufferin county, has a green bin program that has been in full operation since 2007.                                                                                                                                                                                                                                               |                                                                                                                                                                                                                                                                                                                                                                                                                                      |
|       | RM   | DURHAM, REGIONAL MUNICIPALITY OF             | Durham                          | works@durham.ca                                                                                                                                            | NA                                                                                            | 3                          | 1                                               | 2003                       | 2006                         | 1                                   | 1997                        | have greenbin program                                                                                                                                                                                                                                                                                                              |                                                                                                                                                                                                                                                                                                                                                                                                                                      |
|       | MU   | DUTTON-DUNWICH, MUNICIPALITY OF              | Elgin                           | http://www.elgincounty.ca/contact                                                                                                                          | NA                                                                                            | 1                          | 0                                               | NA                         | NA                           | 1                                   | NA                          |                                                                                                                                                                                                                                                                                                                                    |                                                                                                                                                                                                                                                                                                                                                                                                                                      |
|       | TP   | EAST GARAFRAXA, TOWNSHIP OF                  | Dufferin                        | dufferinwaste@dufferincounty.ca                                                                                                                            | NA                                                                                            | 3                          | 1                                               | 2007                       | 2007                         | 1                                   | 1993                        | Dufferin county, has a green bin program that has been in full operation since 2007.                                                                                                                                                                                                                                               |                                                                                                                                                                                                                                                                                                                                                                                                                                      |
|       | TP   | EAST LUTHER GRAND VALLEY, TOWNSHIP OF        | Dufferin                        | dufferinwaste@dufferincounty.ca                                                                                                                            | NA                                                                                            | 3                          | 1                                               | 1999                       | 2007                         | 1                                   | 1993                        | Dufferin county, has a green bin program that has been in full operation since 2007.                                                                                                                                                                                                                                               |                                                                                                                                                                                                                                                                                                                                                                                                                                      |
|       | T    | ESPANOLA, TOWN OF                            | Sudbury                         | NA                                                                                                                                                         | pubworks@espanola.ca                                                                          | 0                          | 0                                               | NA                         | NA                           | 0                                   | NA                          | NA                                                                                                                                                                                                                                                                                                                                 | L&Y                                                                                                                                                                                                                                                                                                                                                                                                                                  |
|       | CY   | ESSEX-WINDSOR SOLID WASTE AUTHORITY          | Essex                           | Essex-Windsor solid waste authority:<br>http://www.ewswa.org/contact-us/<br>http://www.leedsgrenville.com/en/govern/contactus/PublicWorksCont              | NA                                                                                            | 2                          | 0                                               | NA                         | NA                           | 1                                   | NA                          | yard waste                                                                                                                                                                                                                                                                                                                         |                                                                                                                                                                                                                                                                                                                                                                                                                                      |
|       | T    | GANANOQUE, TOWN OF                           | Leeds and Grenville             | act.asp                                                                                                                                                    | NA                                                                                            | 1                          | 0                                               | NA                         | NA                           | 1                                   | NA                          |                                                                                                                                                                                                                                                                                                                                    |                                                                                                                                                                                                                                                                                                                                                                                                                                      |
|       | TP   | GREATER MADAWASKA, TOWNSHIP OF               | Renfrew                         | Ottawa valley waste recovery centre: info@ovwrc.com                                                                                                        | NA<br>http://www.greaternapanee.com/en/livinghere/leavesbrushandyardwaste.asp                 | NA                         | NA                                              | NA                         | NA                           | NA                                  | NA                          |                                                                                                                                                                                                                                                                                                                                    |                                                                                                                                                                                                                                                                                                                                                                                                                                      |
|       | T    | GREATER NAPANEE, TOWNSHIP OF                 | Lennox and Addington            | NA                                                                                                                                                         | NA                                                                                            | 1                          | 0                                               | NA                         | NA                           | 1                                   | NA                          |                                                                                                                                                                                                                                                                                                                                    | L&Y plus backyard composting                                                                                                                                                                                                                                                                                                                                                                                                         |
|       | CV   | GREATER SUDBURY, CITY OF                     | Greater Sudbury / Grand Sudbury | 705-671-2489 or 311@greatersudbury.ca                                                                                                                      | NA                                                                                            | 3                          | 1                                               | 2009                       | 2009                         | 1                                   | 1997/2008                   |                                                                                                                                                                                                                                                                                                                                    | have green cart program                                                                                                                                                                                                                                                                                                                                                                                                              |
|       | MU   | GREY HIGHLANDS, MUNICIPALITY OF              | Grey                            | http://www.grey.ca/services/local-municipalities/?i=7365                                                                                                   | http://www.greyhighlands.ca/gov.php?pgid=190                                                  | 0                          | 0                                               | NA                         | NA                           | 0                                   | NA                          |                                                                                                                                                                                                                                                                                                                                    | backyard composting                                                                                                                                                                                                                                                                                                                                                                                                                  |
|       | CY   | GUELPH, CITY OF                              | Wellington                      | wasteinfo@wellington.ca                                                                                                                                    | waste@guelph.ca                                                                               | 3                          | 1                                               | 2011                       | 2013                         | 1                                   | NA                          | NA                                                                                                                                                                                                                                                                                                                                 | green cart                                                                                                                                                                                                                                                                                                                                                                                                                           |
|       | CY   | HALDIMAND, COUNTY OF                         | Haldimand-Norfolk               | /emailus.aspx                                                                                                                                              | NA                                                                                            | 1                          | 0                                               | NA                         | NA                           | 1                                   | Pre 2011                    |                                                                                                                                                                                                                                                                                                                                    | l&y only                                                                                                                                                                                                                                                                                                                                                                                                                             |
|       | RM   | HALTON, REGIONAL MUNICIPALITY OF             | Halton                          | NA                                                                                                                                                         | accesshalton@halton.ca<br>wastemanagement@hamilton.ca                                         | 3                          | 1                                               | 2006                       | 2018                         | 1                                   | 1996                        | na                                                                                                                                                                                                                                                                                                                                 | green cart program                                                                                                                                                                                                                                                                                                                                                                                                                   |
|       | C    | HAMILTON, CITY OF                            | Hamilton                        | NA                                                                                                                                                         | NA                                                                                            | 3                          | 1                                               | 2006                       | 2010                         | 1                                   | NA                          | na                                                                                                                                                                                                                                                                                                                                 | green bin program                                                                                                                                                                                                                                                                                                                                                                                                                    |
|       | T    | HANOVER, TOWN OF                             | Grey                            | http://www.grey.ca/services/local-municipalities/?i=7365                                                                                                   | rcooper@hanover.ca                                                                            | 1                          | 0                                               | NA                         | NA                           | 1                                   | 1995                        |                                                                                                                                                                                                                                                                                                                                    | leaf collection                                                                                                                                                                                                                                                                                                                                                                                                                      |
|       | TP   | HEAD, CLARA AND MARIA, TOWNSHIPS OF          | Renfrew                         | Ottawa valley waste recovery centre: info@ovwrc.com                                                                                                        | NA                                                                                            | 1                          | 0                                               | NA                         | NA                           | 1                                   | NA                          |                                                                                                                                                                                                                                                                                                                                    |                                                                                                                                                                                                                                                                                                                                                                                                                                      |
|       | MU   | HIGHLANDS EAST, MUNICIPALITY OF              | Haliburton                      | NA                                                                                                                                                         | info@highlandseast.ca                                                                         | 0                          | 0                                               | NA                         | NA                           | 0                                   | NA                          | na                                                                                                                                                                                                                                                                                                                                 | ?                                                                                                                                                                                                                                                                                                                                                                                                                                    |
|       | TP   | HILLIARD, TOWNSHIP OF                        | Timiskaming                     | http://www.temiskamingshores.ca/en/city-hall/Contact-Us.asp                                                                                                | NA                                                                                            | 0                          | 0                                               | NA                         | NA                           | 0                                   | NA                          | NA                                                                                                                                                                                                                                                                                                                                 |                                                                                                                                                                                                                                                                                                                                                                                                                                      |
|       | MU   | HURON EAST, MUNICIPALITY OF                  | Huron                           | waste@huroncounty.ca - likely not helpful<br>https://www.city.kawarthalakes.on.ca/contact-info                                                             | http://www.huroneast.com/index.php?slb=cnt                                                    | 1                          | 0                                               | NA                         | NA                           | 1                                   | NA                          |                                                                                                                                                                                                                                                                                                                                    |                                                                                                                                                                                                                                                                                                                                                                                                                                      |
|       | CY   | KAWARTHA LAKES, CITY OF                      | Kawartha Lakes                  | ca/contact-info                                                                                                                                            | NA                                                                                            | 1                          | 0                                               | NA                         | NA                           | 1                                   | NA                          |                                                                                                                                                                                                                                                                                                                                    |                                                                                                                                                                                                                                                                                                                                                                                                                                      |
|       | TP   | KILLALOE, HAGARTY, AND RICHARDS, TOWNSHIP OF | Renfrew                         | Ottawa valley waste recovery centre: info@ovwrc.com                                                                                                        | NA                                                                                            | 2                          | 0                                               | NA                         | NA                           | 1                                   | NA                          |                                                                                                                                                                                                                                                                                                                                    |                                                                                                                                                                                                                                                                                                                                                                                                                                      |
|       | CY   | KINGSTON, CITY OF                            | Frontenac                       | NA                                                                                                                                                         | contactus@cityofkingston.ca                                                                   | 3                          | 1                                               | 2006                       | 2006                         | 1                                   | 2006                        |                                                                                                                                                                                                                                                                                                                                    | organics collection                                                                                                                                                                                                                                                                                                                                                                                                                  |

|     |                                                |                                   |                                                                                                                                                                              |                                                                                                                           |    |    |      |      |   |          |                                                                                      |                                                                                                          |
|-----|------------------------------------------------|-----------------------------------|------------------------------------------------------------------------------------------------------------------------------------------------------------------------------|---------------------------------------------------------------------------------------------------------------------------|----|----|------|------|---|----------|--------------------------------------------------------------------------------------|----------------------------------------------------------------------------------------------------------|
| TP  | LANARK HIGHLANDS, TOWNSHIP OF                  | Lanark                            | responsibility of municipality<br>Ottawa valley waste recovery<br>centre: info@ovwrc.com<br>http://www.leedsgrenville.com/en/<br>govern/contactus/PublicWorksCont<br>act.asp | lhreception@lanarkhighlands.<br>ca                                                                                        | 0  | 0  | NA   | NA   | 0 | NA       |                                                                                      | none, should be implementing L&Y                                                                         |
| T   | LAURENTIAN HILLS, TOWN OF                      | Renfrew                           | http://www.leedsgrenville.com/en/<br>govern/contactus/PublicWorksCont<br>act.asp                                                                                             | NA                                                                                                                        | 0  | 0  | NA   | NA   | 0 | NA       |                                                                                      |                                                                                                          |
| TP  | LEEDS AND THE THOUSAND ISLANDS,<br>TOWNSHIP OF | Leeds and Grenville               | https://www.middlesex.ca/contact                                                                                                                                             | NA                                                                                                                        | 2  | 0  | NA   | NA   | 1 | NA       |                                                                                      |                                                                                                          |
| CY  | LONDON, CITY OF                                | Middlesex                         | https://www.middlesex.ca/contact                                                                                                                                             | es@london.ca                                                                                                              | 2  | 0  | NA   | NA   | 1 | NA       |                                                                                      | L&Y plus backyard composting                                                                             |
| TP  | LOYALIST, TOWNSHIP OF                          | Lennox and<br>Addington           | NA                                                                                                                                                                           | info@loyalist.ca<br>http://www.machartownship<br>.net/guide.html                                                          | 1  | 0  | NA   | NA   | 1 | NA       |                                                                                      | L&Y plus backyard composting                                                                             |
| TP  | MACHAR, TOWNSHIP OF                            | Parry Sound                       | responsibility of municipality<br>Ottawa valley waste recovery<br>centre: info@ovwrc.com                                                                                     | NA                                                                                                                        | 1  | 0  | NA   | NA   | 1 | NA       |                                                                                      |                                                                                                          |
| TP  | MADAWASKA VALLEY, TOWNSHIP OF                  | Renfrew                           | http://www.elgincounty.ca/contact                                                                                                                                            | NA                                                                                                                        | 3  | 1  | 2002 | 2002 | 1 | NA       |                                                                                      |                                                                                                          |
| TP  | MALAHIDE, TOWNSHIP OF                          | Elgin                             | http://www.elgincounty.ca/contact                                                                                                                                            | NA                                                                                                                        | 1  | 0  | NA   | NA   | 1 | NA       |                                                                                      |                                                                                                          |
| T   | MARATHON, TOWN OF                              | Thunder Bay                       | NA                                                                                                                                                                           | http://township.mckellar.on.c<br>a/municipal-<br>services/municiple-<br>departments/waste-<br>management/                 | 1  | 0  | NA   | NA   | 1 | NA       |                                                                                      |                                                                                                          |
| TP  | MCKELLAR, TOWNSHIP OF                          | Parry Sound                       | responsibility of municipality<br>Ottawa valley waste recovery<br>centre: info@ovwrc.com                                                                                     | NA                                                                                                                        | 1  | 0  | NA   | NA   | 1 | NA       |                                                                                      |                                                                                                          |
| TP  | MCNAB-BRAESIDE, TOWNSHIP OF                    | Renfrew                           | by municipality:<br>http://www.grey.ca/services/local-<br>municipalities/?i=7365                                                                                             | waste@meaford.ca                                                                                                          | 3  | 1  | 1998 | 2011 | 1 | 2009     |                                                                                      | green bin                                                                                                |
| MU  | MEAFORD, MUNICIPALITY OF                       | Grey                              | http://www.grey.ca/services/local-<br>municipalities/?i=7365                                                                                                                 | NA                                                                                                                        | 3  | 1  | 2007 | 2007 | 1 | 1993     | Dufferin county, has a green bin program that has been in full operation since 2007. |                                                                                                          |
| TP  | MELANCTHON, TOWNSHIP OF                        | Dufferin                          | dufferinwaste@dufferincounty.ca                                                                                                                                              | NA                                                                                                                        | 3  | 1  | 2007 | 2007 | 1 | 1993     | Dufferin county, has a green bin program that has been in full operation since 2007. |                                                                                                          |
| T   | MISSISSIPPI MILLS, TOWN OF                     | Lanark                            | responsibility of municipality                                                                                                                                               | sp                                                                                                                        | 1  | 0  | NA   | NA   | 1 | NA       |                                                                                      | L&Y and backyard comp                                                                                    |
| T   | MONO, TOWN OF                                  | Dufferin                          | dufferinwaste@dufferincounty.ca                                                                                                                                              | NA                                                                                                                        | 3  | 1  | 2002 | 2007 | 1 | 1993     | Dufferin county, has a green bin program that has been in full operation since 2007. |                                                                                                          |
| TP  | MULMUR, TOWNSHIP OF                            | Dufferin                          | dufferinwaste@dufferincounty.ca                                                                                                                                              | NA                                                                                                                        | 3  | 1  | 2007 | 2007 | 1 | 1993     | Dufferin county, has a green bin program that has been in full operation since 2007. |                                                                                                          |
| DM  | MUSKOKA, DISTRICT MUNICIPALITY OF              | Muskoka                           | publicworks@muskoka.on.ca                                                                                                                                                    | NA                                                                                                                        | 3  | 1  | 2007 | 2012 | 1 | 2004     | Sydney, Port Carling, Bala, MacTier, Port Severn and Honey Harbour                   |                                                                                                          |
| MU  | NEEBING, MUNICIPALITY OF                       | Thunder Bay                       | NA                                                                                                                                                                           | neebing@neebing.org                                                                                                       | 0  | 0  | NA   | NA   | 0 | NA       | NA                                                                                   | organics materials can be dropped at landfill - not sure of the details here.                            |
| RM  | NIAGARA, REGIONAL MUNICIPALITY OF              | Niagara                           | www.niagararegion.ca/government<br>/contact/default.aspx                                                                                                                     | NA                                                                                                                        | 3  | 1  | 2001 | 2011 | 1 | 1996     | have greenbin program                                                                |                                                                                                          |
| CY  | NORFOLK, COUNTY OF                             | Haldimand-Norfolk                 | http://www.haldimandcounty.on.ca<br>/emailus.aspx                                                                                                                            | NA                                                                                                                        | 2  | 0  | NA   | NA   | 1 | Pre 2011 |                                                                                      |                                                                                                          |
| CY  | NORTH BAY, CITY OF                             | Nipissing                         | NA                                                                                                                                                                           | customerservice@cityofnorth<br>bay.ca                                                                                     | 1  | 0  | NA   | NA   | 1 | NA       | na                                                                                   | L&Y plus backyard composting                                                                             |
| MU  | NORTH GRENVILLE, MUNICIPALITY OF               | Leeds and Grenville               | http://www.leedsgrenville.com/en/<br>govern/contactus/PublicWorksCont<br>act.asp                                                                                             | NA                                                                                                                        | 1  | 0  | NA   | NA   | 1 | 2007?    |                                                                                      |                                                                                                          |
| TP  | NORTH HURON, TOWNSHIP OF                       | Huron                             | waste@huroncounty.ca - likely not<br>helpful                                                                                                                                 | http://www.northhuron.ca/c<br>ontact.php                                                                                  | 0  | 0  | NA   | NA   | 0 | NA       |                                                                                      | None                                                                                                     |
| TP  | NORTH STORMONT, TOWNSHIP OF                    | Stormont, Dundas<br>and Glengarry | NA                                                                                                                                                                           | admin@northstormont.ca                                                                                                    | 1  | 0  | NA   | NA   | 1 | NA       | NA                                                                                   | L&Y and backyard                                                                                         |
| MU  | NORTHEASTERN MANITOULIN & ISLANDS,<br>TOWN OF  | Bruce                             | http://www.brucecounty.on.ca/ho<br>me/contact.php                                                                                                                            | NA                                                                                                                        | 1  | 0  | NA   | NA   | 1 | NA       | No evident policy or infrastructure                                                  |                                                                                                          |
| MU  | NORTHERN BRUCE PENINSULA,<br>MUNICIPALITY OF   | Bruce                             | http://www.brucecounty.on.ca/ho<br>me/contact.php                                                                                                                            | http://www.northbrucepenin<br>sula.ca/content/waste                                                                       | 1  | 0  | NA   | NA   | 1 | NA       |                                                                                      |                                                                                                          |
| CTY | NORTHUMBERLAND, COUNTY OF                      | Northumberland                    | nemech@northumberlandcounty.c<br>a                                                                                                                                           | NA                                                                                                                        | 2  | 0  | NA   | NA   | 1 | NA       | L&Y plus backyard composting                                                         | http://www.northumberlandcounty.ca/en/departments_publicworks/resources/waste_master_plan/LTWMM<br>P.pdf |
| T   | ORANGEVILLE, TOWN OF                           | Dufferin                          | dufferinwaste@dufferincounty.ca                                                                                                                                              | NA                                                                                                                        | 3  | 1  | 1999 | 2007 | 1 | 1993     | Dufferin county, has a green bin program that has been in full operation since 2007. |                                                                                                          |
| CY  | ORILLIA, CITY OF                               | Simcoe                            | info@simcoe.ca                                                                                                                                                               | NA                                                                                                                        | 3  | 1  | 2008 | 2008 | 1 | NA       | greenbin program                                                                     |                                                                                                          |
| NA  | OTTAWA VALLEY WASTE RECOVERY CENTRE            | Ottawa                            | NA                                                                                                                                                                           | NA                                                                                                                        | 3  | 1  | 2001 | 2002 | 1 | NA       |                                                                                      |                                                                                                          |
| CV  | OTTAWA, CITY OF                                | Ottawa                            | NA                                                                                                                                                                           | NA                                                                                                                        | 3  | 1  | 2000 | 2010 | 1 | 1994     | na                                                                                   | green bin + L&Y                                                                                          |
| CY  | OWEN SOUND, CITY OF                            | Grey                              | by municipality:<br>http://www.grey.ca/services/local-<br>municipalities/?i=7365                                                                                             | cityadmin@owensound.ca                                                                                                    | 1  | 0  | NA   | NA   | 1 | NA       |                                                                                      | no food waste, but have l&y for drop off                                                                 |
| CTY | OXFORD, RESTRUCTURED COUNTY OF                 | Oxford                            | http://www.oxfordcounty.ca/Conta<br>ct-Us                                                                                                                                    | http://peelregion.ca/contact/waste.<br>htm                                                                                | 2  | 0  | NA   | NA   | 1 | 2004     | none                                                                                 | na                                                                                                       |
| RM  | PEEL, REGIONAL MUNICIPALITY OF                 | Peel                              | http://www.oxfordcounty.ca/Conta<br>ct-Us                                                                                                                                    | NA                                                                                                                        | 3  | 1  | 1994 | 2016 | 1 | NA       | green bin                                                                            |                                                                                                          |
| TP  | PERRY, TOWNSHIP OF                             | Parry Sound                       | responsibility of municipality                                                                                                                                               | info@townshipofperry.ca                                                                                                   | 1  | 0  | NA   | NA   | 1 | NA       | na                                                                                   | none                                                                                                     |
| T   | PERTH, TOWN OF                                 | Lanark                            | responsibility of municipality                                                                                                                                               | hlundberg@perth.ca                                                                                                        | 3  | 1  | 2006 | 2008 | 1 | 2005     |                                                                                      | have green bin program!                                                                                  |
| CY  | PETERBOROUGH, CITY OF                          | Peterborough                      | waste@county.peterborough.on.ca                                                                                                                                              | pubworks@peterborough.ca                                                                                                  | 2  | 0  | NA   | NA   | 1 | 1990     | Some level of organics program.                                                      | Green waste program - drop off                                                                           |
| CTY | PETERBOROUGH, COUNTY OF                        | Peterborough                      | waste@county.peterborough.on.ca                                                                                                                                              | NA                                                                                                                        | 1  | 0  | NA   | NA   | 1 | NA       | Some level of organics program.                                                      | NA                                                                                                       |
| T   | PETROLIA, TOWN OF                              | Lambton                           | responsibility of municipality                                                                                                                                               | http://www.siouxlookout.ca/<br>en/your-local-<br>government/contact-us.asp                                                | 1  | 0  | NA   | NA   | 1 |          |                                                                                      |                                                                                                          |
| T   | PLYMPTON-WYOMING, TOWN OF                      | Lambton                           | responsibility of municipality                                                                                                                                               | http://plympton-<br>wyoming.com/contact                                                                                   | 1  | 0  | NA   | NA   | 0 | NA       | None                                                                                 | None                                                                                                     |
| T   | PRESCOTT, TOWN OF                              | Prescott and Russell              | russell.on.ca                                                                                                                                                                | admin@prescott.ca                                                                                                         | 2  | 0  | NA   | NA   | 1 | NA       | no evident policy, no evident infrastructure                                         | no evident policy, no evident infrastructure                                                             |
| NA  | QUINTE WASTE SOLUTIONS                         | Hastings                          | NA                                                                                                                                                                           | NA                                                                                                                        | NA | NA | NA   | NA   | 1 | NA       |                                                                                      | http://www.prescott.ca/en/our-town-hall/Garbage-and-Recycling.asp                                        |
| T   | RENFREW, TOWN OF                               | Renfrew                           | Ottawa valley waste recovery<br>centre: info@ovwrc.com                                                                                                                       | NA                                                                                                                        | 1  | 0  | NA   | NA   | 1 | NA       |                                                                                      |                                                                                                          |
| TP  | RUSSELL, TOWNSHIP OF                           | Prescott and Russell              | Public works: mclermont@prescott-<br>russell.on.ca                                                                                                                           | publicworks.voirie@russell.ca                                                                                             | 1  | 0  | NA   | NA   | 1 | NA       | no evident policy, no evident infrastructure                                         |                                                                                                          |
| CY  | SARNIA, CITY OF                                | Lambton                           | responsibility of municipality                                                                                                                                               | http://www.sarnia.ca/contact                                                                                              | 2  | 0  | NA   | NA   | 1 | 2009     | None                                                                                 | Drop off leaf and yard waste                                                                             |
| CY  | SAULT STE. MARIE, CITY OF                      | Algoma                            | info@algomacountry.com                                                                                                                                                       | NA                                                                                                                        | 2  | 0  | NA   | NA   | 1 | 2002     | L&Y plus backyard composting                                                         |                                                                                                          |
| TP  | SEGUIN, TOWNSHIP OF                            | Parry Sound                       | responsibility of municipality                                                                                                                                               | /wasterecycling.asp                                                                                                       | 0  | 0  | NA   | NA   | 0 | NA       | na                                                                                   | none                                                                                                     |
| T   | SHELBURNE, TOWN OF                             | Dufferin                          | dufferinwaste@dufferincounty.ca                                                                                                                                              | NA                                                                                                                        | 3  | 1  | 1999 | 2007 | 1 | 1993     | Dufferin county, has a green bin program that has been in full operation since 2007. |                                                                                                          |
| CTY | SIMCOE, COUNTY OF                              | Simcoe                            | info@simcoe.ca                                                                                                                                                               | NA                                                                                                                        | 3  | 1  | 2008 | 2008 | 1 | NA       | greenbin program                                                                     |                                                                                                          |
| MU  | SIoux LOOKOUT, TOWN OF                         | Kenora                            | http://www.kenora.ca/cityhall/city-<br>services/waste-recycling/transfer-<br>facility.aspx                                                                                   | NA                                                                                                                        | 1  | 0  | NA   | NA   | 1 | NA       | None                                                                                 | None                                                                                                     |
| T   | SMITHS FALLS, TOWN OF                          | Lanark                            | responsibility of municipality                                                                                                                                               | vbernicky@smithsfalls.ca<br>http://www.southstormont.c<br>a/?lid=4B6GP-353HC-<br>FMH9R&comaction=message<br>&pkContact=31 | 1  | 0  | NA   | NA   | 1 | NA       |                                                                                      | drop off L&Y and backyard composting                                                                     |
| TP  | SOUTH STORMONT, TOWNSHIP OF                    | Stormont, Dundas<br>and Glengarry | NA                                                                                                                                                                           | http://www.southstormont.c<br>a/?lid=4B6GP-353HC-<br>FMH9R&comaction=message<br>&pkContact=31                             | 2  | 0  | NA   | NA   | 1 | 2006     | NA                                                                                   | L&Y and backyard                                                                                         |
| TP  | SOUTHGATE, TOWNSHIP OF                         | Grey                              | by municipality:<br>http://www.grey.ca/services/local-<br>municipalities/?i=7365                                                                                             | tdupuis@southgate.ca                                                                                                      | 3  | 1  | 2003 | 2003 | 1 | NA       |                                                                                      | Green cart                                                                                               |

|     |                                      |             |                                                                                                                                 |                                                                                                                                                                                         |   |   |      |      |   |              |                                       |
|-----|--------------------------------------|-------------|---------------------------------------------------------------------------------------------------------------------------------|-----------------------------------------------------------------------------------------------------------------------------------------------------------------------------------------|---|---|------|------|---|--------------|---------------------------------------|
| MU  | SOUTHWEST MIDDLESEX, MUNICIPALITY OF | Middlesex   | <a href="https://www.middlesex.ca/contact">https://www.middlesex.ca/contact</a>                                                 | NA                                                                                                                                                                                      | 0 | 0 | NA   | NA   | 0 | NA           |                                       |
| MU  | ST. CHARLES, MUNICIPALITY OF         | Sudbury     | NA                                                                                                                              | <a href="mailto:pw@stcharlesontario.ca">pw@stcharlesontario.ca</a>                                                                                                                      | 1 | 0 | NA   | NA   | 1 | NA           |                                       |
| TP  | ST. CLAIR, TOWNSHIP OF               | Lambton     | responsibility of municipality                                                                                                  | a                                                                                                                                                                                       | 1 | 0 | NA   | NA   | 1 | NA           | None                                  |
| CY  | ST. THOMAS, CITY OF                  | Elgin       | <a href="http://www.elgincounty.ca/contact">http://www.elgincounty.ca/contact</a>                                               | NA                                                                                                                                                                                      | 3 | 1 | 2001 | 2001 | 1 | 2001         | green bin program                     |
| CY  | STRATFORD, CITY OF                   | Perth       | NA                                                                                                                              | <a href="https://www.stratfordcanada.ca/en/livehere/leafandyardwaste.asp">https://www.stratfordcanada.ca/en/livehere/leafandyardwaste.asp</a>                                           | 2 | 0 | NA   | NA   | 1 | NA           | N/A                                   |
| MU  | STRONG, TOWNSHIP OF                  | Parry Sound | responsibility of municipality                                                                                                  | <a href="http://www.strongtownship.com/content/community-information/waste-management#contact">http://www.strongtownship.com/content/community-information/waste-management#contact</a> | 0 | 0 | NA   | NA   | 0 | NA           |                                       |
| MU  | THAMES CENTRE, MUNICIPALITY OF       | Middlesex   | <a href="https://www.middlesex.ca/contact">https://www.middlesex.ca/contact</a>                                                 | NA                                                                                                                                                                                      | 1 | 0 | NA   | NA   | 1 | NA           |                                       |
| T   | THE BLUE MOUNTAINS, TOWN OF          | Grey        | <a href="http://www.grey.ca/services/local-municipalities/?i=7365">http://www.grey.ca/services/local-municipalities/?i=7365</a> | <a href="mailto:ipwinfo@thebluemountains.ca">ipwinfo@thebluemountains.ca</a>                                                                                                            | 3 | 1 | 2015 | NA   | 1 | 2015         | Green bin                             |
| CY  | THUNDER BAY, CITY OF                 | Thunder Bay | NA                                                                                                                              | <a href="mailto:mjsmith@thunderbay.ca">mjsmith@thunderbay.ca</a>                                                                                                                        | 1 | 0 | NA   | NA   | 1 | NA           | NA                                    |
| C   | TIMMINS, CITY OF                     | Cochrane    | NA                                                                                                                              | <a href="http://www.timmins.ca/residents/waste-management">http://www.timmins.ca/residents/waste-management</a>                                                                         | 1 | 0 | NA   | NA   | 1 | NA           |                                       |
| C   | TORONTO, CITY OF                     | Toronto     | NA                                                                                                                              | 311@toronto.ca                                                                                                                                                                          | 3 | 1 | 2002 | 2009 | 1 | Pre 1990     | NA                                    |
| RM  | WATERLOO, REGIONAL MUNICIPALITY OF   | Waterloo    | <a href="mailto:Greenbin@regionofwaterloo.ca">Greenbin@regionofwaterloo.ca</a>                                                  | NA                                                                                                                                                                                      | 3 | 1 | 2006 | 2010 | 1 | 80's or 90's | green bin program                     |
| CTY | WELLINGTON, COUNTY OF                | Wellington  | <a href="mailto:wasteinfo@wellington.ca">wasteinfo@wellington.ca</a>                                                            | NA                                                                                                                                                                                      | 0 | 0 | NA   | NA   | 0 | NA           | maybe L&Y? hard to say                |
| MU  | WEST ELGIN, MUNICIPALITY OF          | Elgin       | <a href="http://www.elgincounty.ca/contact">http://www.elgincounty.ca/contact</a>                                               | NA                                                                                                                                                                                      | 1 | 0 | NA   | NA   | 0 | NA           |                                       |
| MU  | WEST GREY, MUNICIPALITY OF           | Grey        | <a href="http://www.grey.ca/services/local-municipalities/?i=7365">http://www.grey.ca/services/local-municipalities/?i=7365</a> | <a href="mailto:jnuhn@westgrey.com">jnuhn@westgrey.com</a>                                                                                                                              | 1 | 0 | NA   | NA   | 1 | NA           |                                       |
| RM  | YORK, REGIONAL MUNICIPALITY OF       | York        | <a href="mailto:info@york.ca">info@york.ca</a>                                                                                  | NA                                                                                                                                                                                      | 3 | 1 | 2004 | 2007 | 1 | Pre 1990     | green bin within local municipalities |

- Unreliable data (do not have at least 3 consecutive years of data collection, are lacking at least 1 non-zero diversion value, or are missing factorial data)
- Region unclear
- Diversion data (other than 2013) adjusted due to infeasibility
- 2013 data not available
- Not included in final FAMD and regression models
- Unknown (although program does exist)



|                                              |      |      |      |      |      |      |      |      |       |       |       |       |       |       |       |       |        |        |        |        |        |        |        |        |      |      |      |      |      |      |      |      |      |
|----------------------------------------------|------|------|------|------|------|------|------|------|-------|-------|-------|-------|-------|-------|-------|-------|--------|--------|--------|--------|--------|--------|--------|--------|------|------|------|------|------|------|------|------|------|
| ELLIOT LAKE, CITY OF                         | 0.00 | 0.00 | 0.00 | 0.00 | 0.00 | 0.00 | 0.00 | 0.00 | 0     | 0     | 0     | 0     | 0     | 0     | 0     | 0     | 3726   | 3065   | 2801   | 3791   | 3636   | 2709   | 2439   | 2423   | 0.00 | 0.00 | 0.00 | 0.00 | 0.00 | 0.00 | 0.00 | 0.00 |      |
| EMO, TOWNSHIP OF                             | 0.00 | 0.00 | 0.00 | 0.00 | 0.00 | 0.00 | 0.00 | 0.00 | 0     | 0     | 0     | 0     | 0     | 0     | 0     | 0     | 687    | 329    | 368    | 375    | 350    | 358    | 420    | 350    | 0.00 | 0.00 | 0.00 | 0.00 | 0.00 | 0.00 | 0.00 | 0.00 |      |
| ENNISKILLEN, TOWNSHIP OF                     | 0.00 | 0.00 | 0.00 | 0.00 | 0.00 | 0.00 | 0.00 | 0.00 | 0     | 0     | 0     | 0     | 0     | 0     | 0     | 0     | 821    | 917    | 976    | 1144   | 854    | 958    | 912    | 807    | 0.00 | 0.00 | 0.00 | 0.00 | 0.00 | 0.00 | 0.00 | 0.00 |      |
| ESPAÑOLA, TOWN OF                            | 0.00 | 0.00 | 0.00 | 0.00 | 0.00 | 0.00 | 0.00 | 0.02 | 1     | 1     | 1     | 1     | 1     | 3     | 3     | 23    | 2923   | 2849   | 1824   | 2085   | 2058   | 1757   | 2234   | 2539   | 0.00 | 0.00 | 0.00 | 0.00 | 0.00 | 0.00 | 0.00 | 0.01 |      |
| ESSEX-WINDSOR SOLID WASTE AUTHORITY          | 0.22 | 0.26 | 0.24 | 0.29 | 0.36 | 0.31 | 0.34 | 0.32 | 13565 | 16425 | 14505 | 15992 | 21974 | 19670 | 21015 | 19693 | 156692 | 157077 | 154270 | 136160 | 153203 | 157057 | 155223 | 155099 | 0.09 | 0.10 | 0.09 | 0.12 | 0.14 | 0.13 | 0.14 | 0.13 |      |
| FARADAY, TOWNSHIP OF                         | NA   | NA   | NA   | 0.00 | 0.00 | 0.00 | 0.00 | 0.00 | NA    | NA    | NA    | 0     | 0     | 0     | 0     | 0     | NA     | NA     | NA     | 604    | 606    | 508    | 808    | 628    | NA   | NA   | NA   | 0.00 | 0.00 | 0.00 | 0.00 | 0.00 |      |
| FORT FRANCES, TOWN OF                        | 0.00 | 0.00 | 0.00 | 0.00 | 0.00 | 0.00 | 0.00 | 0.00 | 0     | 0     | 0     | 0     | 0     | 0     | 0     | 0     | 3574   | 3169   | 3066   | 2604   | 3006   | 3061   | 3126   | 3187   | 0.00 | 0.00 | 0.00 | 0.00 | 0.00 | 0.00 | 0.00 | 0.00 |      |
| FRENCH RIVER, MUNICIPALITY OF                | NA   | NA   | NA   | 0.00 | 0.00 | 0.00 | 0.00 | 0.00 | NA    | NA    | NA    | 0     | 0     | 0     | 0     | 0     | NA     | NA     | NA     | 962    | 901    | 869    | 911    | 834    | NA   | NA   | NA   | 0.00 | 0.00 | 0.00 | 0.00 | 0.00 |      |
| FRONT OF YONGE, TOWNSHIP OF                  | 0.00 | 0.00 | 0.00 | 0.00 | 0.00 | 0.00 | 0.00 | 0.00 | 0     | 0     | 0     | 0     | 0     | 0     | 0     | 0     | 1112   | 932    | 904    | 942    | 982    | 914    | 853    | 841    | 0.00 | 0.00 | 0.00 | 0.00 | 0.00 | 0.00 | 0.00 | 0.00 |      |
| FRONTENAC ISLANDS, TOWNSHIP OF               | 0.00 | 0.00 | 0.00 | 0.00 | 0.00 | 0.00 | 0.00 | 0.00 | 0     | 0     | 0     | 0     | 0     | 0     | 0     | 0     | 1034   | 1216   | 740    | 815    | 823    | 671    | 681    | 737    | 0.00 | 0.00 | 0.00 | 0.00 | 0.00 | 0.00 | 0.00 | 0.00 |      |
| GANANOQUE, TOWN OF                           | 0.41 | 0.00 | 0.00 | 0.00 | 0.32 | 0.29 | 0.30 | 0.32 | 314   | 0     | 0     | 0     | 213   | 213   | 213   | 223   | 1903   | 1415   | 1451   | 1435   | 1653   | 1831   | 1761   | 1725   | 0.17 | 0.00 | 0.00 | 0.00 | 0.13 | 0.12 | 0.12 | 0.13 |      |
| GEORGIAN BLUFFS, TOWNSHIP OF                 | 0.00 | 0.00 | 0.00 | 0.00 | 0.00 | 0.00 | 0.00 | 0.00 | 0     | 0     | 0     | 0     | 0     | 0     | 0     | 0     | 2810   | 2921   | 2658   | 2485   | 2186   | 1953   | 2028   | 2232   | 0.00 | 0.00 | 0.00 | 0.00 | 0.00 | 0.00 | 0.00 | 0.00 |      |
| GILLIES, TOWNSHIP OF                         | 0.00 | 0.00 | 0.00 | 0.00 | 0.00 | 0.00 | 0.00 | 0.00 | 0     | 0     | 0     | 0     | 0     | 0     | 0     | 0     | 110    | 109    | 172    | 192    | 178    | 148    | 157    | 132    | 0.00 | 0.00 | 0.00 | 0.00 | 0.00 | 0.00 | 0.00 | 0.00 |      |
| GREATER MADAWASKA, TOWNSHIP OF               | 0.00 | 0.00 | 0.00 | 0.00 | 0.00 | 0.00 | 0.01 | 0    | 0     | 0     | 0     | 1     | 0     | 0     | 3     | 1316  | 1478   | 1034   | 1242   | 1210   | 1037   | 1022   | 1295   | 0.00   | 0.00 | 0.00 | 0.00 | 0.00 | 0.00 | 0.00 | 0.00 |      |      |
| GREATER NAPANEE, TOWNSHIP OF                 | 0.04 | 0.05 | 0.04 | 0.05 | 0.23 | 0.21 | 0.01 | 0.04 | 60    | 65    | 65    | 77    | 370   | 374   | 18    | 62    | 3661   | 3448   | 3674   | 3499   | 4089   | 4362   | 3586   | 4021   | 0.02 | 0.02 | 0.02 | 0.02 | 0.09 | 0.09 | 0.01 | 0.02 |      |
| GREATER SUDBURY, CITY OF                     | 0.22 | 0.28 | 0.22 | 0.30 | 0.33 | 0.35 | 0.36 | 0.35 | 5506  | 8407  | 6982  | 8777  | 10613 | 10718 | 10914 | 11262 | 62055  | 76102  | 80431  | 74344  | 78593  | 76698  | 76652  | 80004  | 0.09 | 0.11 | 0.09 | 0.12 | 0.14 | 0.14 | 0.14 | 0.14 |      |
| GREY HIGHLANDS, MUNICIPALITY OF              | 0.00 | 0.00 | 0.00 | 0.00 | 0.00 | 0.00 | 0.02 | 0.02 | 0     | 0     | 0     | 0     | 0     | 0     | 40    | 31    | 13929  | 12120  | 3961   | 4232   | 5626   | 6103   | 5135   | 4181   | 0.00 | 0.00 | 0.00 | 0.00 | 0.00 | 0.00 | 0.01 | 0.01 |      |
| GUELPH, CITY OF                              | 0.39 | 0.63 | 0.37 | 0.40 | 0.35 | 0.45 | 0.79 | 0.82 | 7157  | 13767 | 6843  | 7215  | 6028  | 7932  | 13834 | 16385 | 45956  | 54254  | 46160  | 45308  | 42903  | 44189  | 43735  | 50108  | 0.16 | 0.25 | 0.15 | 0.16 | 0.14 | 0.18 | 0.32 | 0.33 |      |
| HALDIMAND, COUNTY OF                         | 0.03 | 0.05 | 0.05 | 0.06 | 0.05 | 0.05 | 0.06 | 0.06 | 210   | 340   | 390   | 433   | 362   | 361   | 387   | 388   | 19146  | 18053  | 17857  | 16769  | 16561  | 17315  | 16216  | 16607  | 0.01 | 0.02 | 0.02 | 0.03 | 0.02 | 0.02 | 0.02 | 0.02 |      |
| HALTON, REGIONAL MUNICIPALITY OF             | 0.26 | 0.25 | 0.58 | 0.66 | 0.66 | 0.62 | 0.60 | 0.63 | 21296 | 18740 | 46962 | 52087 | 51388 | 50143 | 49188 | 52501 | 207621 | 187172 | 201103 | 197537 | 194787 | 203302 | 205538 | 207764 | 0.10 | 0.10 | 0.23 | 0.26 | 0.26 | 0.25 | 0.24 | 0.25 |      |
| HAMILTON, CITY OF                            | 0.37 | 0.37 | 0.48 | 0.50 | 0.52 | 0.52 | 0.50 | 0.51 | 34734 | 33926 | 43267 | 43583 | 44849 | 44507 | 43890 | 45561 | 231936 | 228229 | 227210 | 218014 | 214897 | 215712 | 217683 | 222233 | 0.15 | 0.15 | 0.19 | 0.20 | 0.21 | 0.21 | 0.20 | 0.21 |      |
| HANOVER, TOWN OF                             | 0.00 | 0.00 | 0.00 | 0.00 | 0.05 | 0.05 | 0.12 | 0.10 | 0     | 0     | 0     | 3     | 44    | 36    | 89    | 84    | 3839   | 2081   | 2170   | 2673   | 2106   | 1923   | 1913   | 2007   | 0.00 | 0.00 | 0.00 | 0.00 | 0.02 | 0.02 | 0.05 | 0.04 |      |
| HARLEY, TOWNSHIP OF                          | 0.00 | 0.00 | 0.00 | 0.00 | 0.00 | 0.00 | 0.00 | 0.00 | 0     | 0     | 0     | 0     | 0     | 0     | 0     | 0     | 406    | 218    | 301    | 239    | 231    | 216    | 232    | 217    | 0.00 | 0.00 | 0.00 | 0.00 | 0.00 | 0.00 | 0.00 | 0.00 |      |
| HASTINGS HIGHLANDS, MUNICIPALITY OF          | 0.00 | 0.00 | 0.00 | 0.00 | 0.00 | 0.00 | 0.00 | 0.00 | 0     | 0     | 0     | 0     | 0     | 0     | 0     | 0     | 1362   | 1313   | 1702   | 1438   | 1569   | 1702   | 1431   | 2145   | 0.00 | 0.00 | 0.00 | 0.00 | 0.00 | 0.00 | 0.00 | 0.00 |      |
| HAWKESBURY JOINT RECYCLING                   | 0.00 | 0.00 | 0.00 | 0.00 | 0.00 | 0.00 | 0.00 | 0.00 | 0     | 0     | 0     | 0     | 0     | 0     | 0     | 0     | 10849  | 11483  | 10268  | 7073   | 7163   | 7101   | 9955   | 9944   | 0.00 | 0.00 | 0.00 | 0.00 | 0.00 | 0.00 | 0.00 | 0.00 |      |
| HEAD, CLARA AND MARIA, TOWNSHIPS OF          | NA   | 0.17 | 0.35 | 0.02 | 0.40 | 0.26 | 0.32 | 0.12 | NA    | 16    | 19    | 1     | 30    | 23    | 20    | 16    | NA     | 236    | 136    | 121    | 187    | 219    | 156    | 327    | NA   | 0.07 | 0.14 | 0.01 | 0.16 | 0.10 | 0.13 | 0.05 |      |
| HIGHLANDS EAST, MUNICIPALITY OF              | 0.00 | 0.01 | 0.01 | 0.01 | 0.01 | 0.01 | 0.01 | 0.01 | 4     | 4     | 5     | 5     | 6     | 9     | 12    | 12    | 2090   | 1839   | 1745   | 2155   | 2150   | 2255   | 2293   | 2542   | 0.00 | 0.00 | 0.00 | 0.00 | 0.00 | 0.00 | 0.01 | 0.00 |      |
| HILLIARD, TOWNSHIP OF                        | 0.00 | 0.00 | 0.00 | 0.01 | 0.01 | 0.00 | 0.00 | 0.00 | 0     | 0     | 0     | 0     | 0     | 0     | 0     | 0     | 41     | 41     | 102    | 113    | 88     | 91     | 88     | 84     | 0.00 | 0.00 | 0.00 | 0.00 | 0.00 | 0.00 | 0.00 | 0.00 |      |
| HILTON BEACH, VILLAGE OF                     | NA   | NA   | NA   | NA   | NA   | NA   | 0.01 | 0.00 | NA    | NA    | NA    | NA    | NA    | NA    | 0     | 0     | NA     | NA     | NA     | NA     | NA     | NA     | 153    | 139    | NA   | NA   | NA   | NA   | NA   | NA   | 0.00 | 0.00 |      |
| HORTON, TOWNSHIP OF                          | 0.00 | 0.00 | 0.00 | 0.00 | 0.00 | 0.00 | 0.00 | 0.00 | 0     | 0     | 0     | 0     | 0     | 0     | 0     | 0     | 1796   | 1625   | 716    | 933    | 928    | 894    | 1418   | 1209   | 0.00 | 0.00 | 0.00 | 0.00 | 0.00 | 0.00 | 0.00 | 0.00 |      |
| HOWICK, TOWNSHIP OF                          | 0.00 | 0.00 | 0.00 | 0.00 | 0.00 | 0.00 | 0.00 | 0.00 | 0     | 0     | 0     | 0     | 0     | 0     | 0     | 0     | 1105   | 1539   | 1047   | 1239   | 1300   | 1201   | 828    | 986    | 0.00 | 0.00 | 0.00 | 0.00 | 0.00 | 0.00 | 0.00 | 0.00 |      |
| HUDSON, TOWNSHIP OF                          | 0.00 | 0.00 | 0.00 | 0.00 | 0.00 | 0.00 | 0.00 | 0.00 | 0     | 0     | 0     | 0     | 0     | 0     | 0     | 0     | 341    | 171    | 165    | 200    | 182    | 189    | 187    | 177    | 0.00 | 0.00 | 0.00 | 0.00 | 0.00 | 0.00 | 0.00 | 0.00 |      |
| HURON SHORES, MUNICIPALITY OF                | 0.00 | 0.00 | 0.00 | 0.00 | 0.00 | 0.00 | 0.00 | 0.00 | 0     | 0     | 0     | 0     | 0     | 0     | 0     | 0     | 1159   | 737    | 656    | 689    | 705    | 605    | 628    | 767    | 0.00 | 0.00 | 0.00 | 0.00 | 0.00 | 0.00 | 0.00 | 0.00 |      |
| JAMES, TOWNSHIP OF                           | NA    | NA    | NA    | NA    | NA    | NA    | NA    | NA    | NA     | NA     | NA     | NA     | NA     | NA     | NA     | 251    | NA   | 0.00 | 0.00 |
| JOHNSON, TOWNSHIP OF                         | 0.00 | 0.00 | 0.00 | 0.00 | 0.00 | 0.00 | 0.00 | 0.00 | 0     | 0     | 0     | 0     | 0     | 0     | 0     | 0     | 662    | 666    | 351    | 279    | 360    | 285    | NA     | NA     | 0.00 | 0.00 | 0.00 | 0.00 | 0.00 | 0.00 | 0.00 | 0.00 | 0.00 |
| KAWARTHA LAKES, CITY OF                      | 0.01 | 0.03 | 0.03 | 0.03 | 0.08 | 0.18 | 0.21 | 0.23 | 156   | 308   | 271   | 264   | 764   | 2302  | 2707  | 2968  | 31007  | 25515  | 23902  | 24702  | 25102  | 31386  | 32734  | 32878  | 0.01 | 0.01 | 0.01 | 0.01 | 0.03 | 0.07 | 0.08 | 0.09 |      |
| KEARNEY, TOWN OF                             | 0.00 | 0.00 | 0.00 | 0.00 | 0.00 | 0.00 | 0.00 | 0.00 | 0     | 0     | 0     | 0     | 0     | 0     | 0     | 0     | 1115   | 510    | 477    | 410    | 530    | 479    | 469    | 565    | 0.00 | 0.00 | 0.00 | 0.00 | 0.00 | 0.00 | 0.00 | 0.00 |      |
| KENORA, CITY OF                              | 0.00 | 0.00 | 0.00 | 0.00 | 0.00 | 0.00 | 0.00 | 0.00 | 0     | 0     | 0     | 0     | 0     | 0     | 0     | 0     | 4919   | 4553   | 4330   | 4397   | 4152   | 3972   | 4194   | 4988   | 0.00 | 0.00 | 0.00 | 0.00 | 0.00 | 0.00 | 0.00 | 0.00 |      |
| KERNS, TOWNSHIP OF                           | 0.00 | 0.00 | 0.00 | 0.00 | 0.00 | 0.00 | 0.00 | 0.00 | 0     | 0     | 0     | 0     | 0     | 0     | 0     | 0     | 244    | 130    | 115    | 127    | 116    | 111    | 145    | 146    | 0.00 | 0.00 | 0.00 | 0.00 | 0.00 | 0.00 | 0.00 | 0.00 |      |
| KILLALOE, HAGARTY, AND RICHARDS, TOWNSHIP OF | 0.00 | 0.00 | 0.01 | 0.01 | 0.01 | 0.02 | 0.03 | 0.07 | 0     | 0     | 3     | 3     | 4     | 6     | 10    | 29    | 1226   | 1031   | 913    | 1024   | 1028   | 918    | 740    | 985    | 0.00 | 0.00 | 0.00 | 0.00 | 0.00 | 0.01 | 0.01 | 0.03 |      |
| KILLARNEY, MUNICIPALITY OF                   | 0.00 | 0.00 | 0.00 | 0.00 | 0.00 | 0.00 | 0.00 | 0.00 | 0     | 0     | 0     | 0     | 0     | 0     | 0     | 0     | 865    | 198    | 328    | 345    | 328    | 298    | 298    | 571    | 0.00 | 0.00 | 0.00 | 0.00 | 0.00 | 0.00 | 0.00 | 0.00 |      |
| KINGSTON, CITY OF                            | 0.35 | 0.32 | 0.38 | 0.50 | 0.65 | 0.47 | 0.49 | 0.55 | 6471  | 5846  | 7095  | 9195  | 11215 | 7826  | 7766  | 8914  | 46554  | 45420  | 46568  | 46340  | 43056  | 41871  | 39766  | 40784  | 0.14 | 0.13 | 0.15 | 0.20 | 0.26 | 0.19 | 0.20 | 0.22 |      |
| KIRKLAND LAKE, TOWN OF                       | 0.00 | 0.00 | 0.00 | 0.00 | 0.00 | 0.00 | 0.00 | 0.00 | 0     | 0     | 0     | 0     | 0     | 0     | 0     | 0     | 3176   | 3038   | 3059   | 3062   | 3143   | 2910   | 3345   | 3034   | 0.00 | 0.00 | 0.00 | 0.00 | 0.00 | 0.00 | 0.00 | 0.00 |      |
| LANARK HIGHLANDS, TOWNSHIP OF                | 0.00 | 0.00 | 0.00 | 0.00 | 0.00 | 0.00 | 0.00 | 0.00 | 2     | 3     | 3     | 3     | 3     | 3     | 3     | 4     | 2598   | 2552   |        |        |        |        |        |        |      |      |      |      |      |      |      |      |      |

|                                            |      |      |      |      |      |      |      |      |       |       |       |       |       |       |       |       |        |        |        |        |        |        |        |        |      |      |      |      |      |      |      |      |      |
|--------------------------------------------|------|------|------|------|------|------|------|------|-------|-------|-------|-------|-------|-------|-------|-------|--------|--------|--------|--------|--------|--------|--------|--------|------|------|------|------|------|------|------|------|------|
| NORTH STORMONT, TOWNSHIP OF                | 0.00 | 0.05 | 0.06 | 0.06 | 0.07 | 0.07 | 0.06 | 0.05 | 0     | 42    | 45    | 39    | 52    | 51    | 45    | 37    | 1831   | 1962   | 1926   | 1767   | 1770   | 1838   | 1777   | 1759   | 0.00 | 0.02 | 0.02 | 0.02 | 0.03 | 0.03 | 0.03 | 0.02 |      |
| NORTHEASTERN MANITOULIN & ISLANDS, TOWN OF | 0.00 | 0.00 | 0.00 | 0.00 | 0.00 | 0.00 | 0.00 | 0.00 | 0     | 0     | 0     | 0     | 0     | 0     | 0     | 0     | 1454   | 1249   | 1073   | 1307   | 1249   | 1117   | 1120   | 955    | 0.00 | 0.00 | 0.00 | 0.00 | 0.00 | 0.00 | 0.00 | 0.00 |      |
| NORTHERN BRUCE PENINSULA, MUNICIPALITY OF  | 0.00 | 0.00 | 0.00 | 0.14 | 0.22 | 0.33 | 0.27 | 0.21 | 0     | 0     | 0     | 134   | 192   | 264   | 237   | 229   | 3982   | 1732   | 1788   | 2317   | 2170   | 1990   | 2157   | 2742   | 0.00 | 0.00 | 0.00 | 0.06 | 0.09 | 0.13 | 0.11 | 0.08 |      |
| NORTHUMBERLAND, COUNTY OF                  | 0.09 | 0.11 | 0.18 | 0.16 | 0.16 | 0.17 | 0.18 | 0.19 | 1082  | 1308  | 2049  | 1727  | 1736  | 1894  | 2023  | 2072  | 30783  | 28516  | 28655  | 26587  | 27300  | 27403  | 27628  | 27783  | 0.04 | 0.05 | 0.07 | 0.06 | 0.06 | 0.07 | 0.07 | 0.07 |      |
| OCONNOR, TOWNSHIP OF                       | 0.00 | 0.00 | 0.00 | 0.00 | 0.00 | 0.00 | 0.00 | 0.00 | 0     | 0     | 0     | 0     | 0     | 0     | 0     | 0     | 343    | 197    | 275    | 237    | 218    | 202    | 191    | 201    | 0.00 | 0.00 | 0.00 | 0.00 | 0.00 | 0.00 | 0.00 | 0.00 |      |
| OLIVER PAIPOONGE, MUNICIPALITY OF          | 0.00 | 0.00 | 0.00 | 0.00 | 0.00 | 0.00 | 0.00 | 0.00 | 0     | 0     | 0     | 0     | 0     | 0     | 0     | 0     | 4683   | 1824   | 1876   | 1888   | 1805   | 1742   | 1774   | 1685   | 0.00 | 0.00 | 0.00 | 0.00 | 0.00 | 0.00 | 0.00 | 0.00 |      |
| ONEIDA NATION OF THE THAMES                | NA    | NA    | NA    | NA    | NA    | NA    | NA    | 0     | NA     | NA     | NA     | NA     | NA     | NA     | 534    | 541    | 613  | NA   | NA   | NA   | NA   | NA   | 0.00 | 0.00 |      |
| ORANGEVILLE, TOWN OF                       | 0.15 | 0.30 | 0.40 | 0.39 | 0.39 | 0.39 | 0.43 | NA   | 710   | 1264  | 1804  | 1665  | 1710  | 1833  | 2028  | NA    | 11469  | 10589  | 11379  | 10623  | 10918  | 11761  | 11684  | NA     | 0.06 | 0.12 | 0.16 | 0.16 | 0.16 | 0.16 | 0.17 | 0.20 |      |
| ORILLIA, CITY OF                           | 0.47 | 0.43 | 0.49 | 0.60 | 0.62 | 0.66 | 0.40 | 0.66 | 2872  | 2473  | 2851  | 3542  | 3572  | 3778  | 2147  | 3616  | 15433  | 14281  | 14544  | 14840  | 14411  | 14335  | 13506  | 13743  | 0.19 | 0.17 | 0.20 | 0.24 | 0.25 | 0.26 | 0.16 | 0.26 |      |
| OTTAWA VALLEY WASTE RECOVERY CENTRE        | 0.51 | 0.56 | 0.52 | 0.61 | 0.60 | 0.60 | 0.60 | 0.58 | 3509  | 3666  | 3975  | 4852  | 4548  | 4642  | 4432  | 4600  | 17161  | 16264  | 18972  | 19994  | 18818  | 19365  | 18417  | 19979  | 0.20 | 0.23 | 0.21 | 0.24 | 0.24 | 0.24 | 0.24 | 0.23 |      |
| OTTAWA, CITY OF                            | 0.22 | 0.22 | 0.25 | 0.27 | 0.40 | 0.44 | 0.47 | 0.57 | 29429 | 29798 | 34500 | 35991 | 53723 | 63233 | 64589 | 79790 | 339307 | 331571 | 341629 | 337706 | 337894 | 361755 | 342612 | 350657 | 0.09 | 0.09 | 0.10 | 0.11 | 0.16 | 0.17 | 0.19 | 0.23 |      |
| OWEN SOUND, CITY OF                        | 0.36 | 0.35 | 0.23 | 0.15 | 0.29 | 0.37 | 0.47 | 0.44 | 1247  | 1096  | 878   | 602   | 1258  | 1309  | 1309  | 1275  | 8754   | 7745   | 9415   | 10027  | 10995  | 8775   | 7014   | 7202   | 0.14 | 0.14 | 0.09 | 0.06 | 0.11 | 0.15 | 0.19 | 0.18 |      |
| OXFORD, RESTRUCTURED COUNTY OF             | 0.28 | 0.42 | 0.39 | 0.48 | 0.52 | 0.51 | 0.52 | 0.62 | 3170  | 5128  | 4728  | 5953  | 8193  | 8637  | 9672  | 10626 | 27887  | 30350  | 29973  | 31058  | 39131  | 42570  | 46938  | 42714  | 0.11 | 0.17 | 0.16 | 0.19 | 0.21 | 0.20 | 0.21 | 0.25 |      |
| PAPINEAU-CAMERON, TOWNSHIP OF              | 0.00 | 0.00 | 0.00 | 0.00 | 0.00 | 0.00 | 0.00 | 0.00 | 0     | 0     | 0     | 0     | 0     | 0     | 0     | 0     | 236    | 378    | 293    | 341    | 356    | 261    | 181    | 328    | 0.00 | 0.00 | 0.00 | 0.00 | 0.00 | 0.00 | 0.00 | 0.00 |      |
| PARRY SOUND, TOWN OF                       | 0.00 | 0.00 | 0.00 | 0.00 | 0.00 | 0.00 | 0.00 | 0.00 | 0     | 0     | 0     | 0     | 0     | 0     | 0     | 0     | 2875   | 2627   | 2545   | 2518   | 2460   | 2507   | 2408   | 2291   | 0.00 | 0.00 | 0.00 | 0.00 | 0.00 | 0.00 | 0.00 | 0.00 |      |
| PEEL, REGIONAL MUNICIPALITY OF             | 0.25 | 0.35 | 0.43 | 0.44 | 0.36 | 0.37 | 0.40 | 0.39 | 45710 | 68093 | 87400 | 87000 | 69759 | 74101 | 78544 | 78086 | 460815 | 489304 | 503126 | 492586 | 482555 | 494973 | 486255 | 497226 | 0.10 | 0.14 | 0.17 | 0.18 | 0.14 | 0.15 | 0.16 | 0.16 |      |
| PERRY, TOWNSHIP OF                         | 0.00 | 0.00 | 0.00 | 0.00 | 0.05 | 0.05 | 0.05 | 0.04 | 0     | 0     | 0     | 0     | 15    | 17    | 19    | 16    | 1897   | 648    | 800    | 906    | 732    | 790    | 1007   | 1015   | 0.00 | 0.00 | 0.00 | 0.00 | 0.02 | 0.02 | 0.02 | 0.02 |      |
| PERTH, TOWN OF                             | 0.10 | 0.18 | 0.17 | 0.60 | 0.52 | 0.51 | 0.48 | 0.28 | 203   | 198   | 233   | 674   | 569   | 572   | 546   | 258   | 5000   | 2816   | 3410   | 2804   | 2761   | 2790   | 2841   | 2271   | 0.04 | 0.07 | 0.07 | 0.24 | 0.21 | 0.20 | 0.19 | 0.11 |      |
| PETERBOROUGH, CITY OF                      | 0.34 | 0.29 | 0.33 | 0.33 | 0.37 | 0.36 | 0.35 | 0.37 | 4587  | 3842  | 5012  | 4914  | 5129  | 5220  | 5151  | 5155  | 33867  | 33361  | 38038  | 37236  | 34501  | 35986  | 36949  | 34710  | 0.14 | 0.12 | 0.13 | 0.13 | 0.15 | 0.15 | 0.14 | 0.15 |      |
| PETERBOROUGH, COUNTY OF                    | 0.00 | 0.01 | 0.03 | 0.07 | 0.08 | 0.14 | 0.10 | 0.11 | 43    | 85    | 97    | 687   | 714   | 1423  | 929   | 1103  | 25011  | 20453  | 22128  | 23568  | 23684  | 24671  | 24105  | 24688  | 0.00 | 0.00 | 0.00 | 0.03 | 0.03 | 0.06 | 0.04 | 0.04 |      |
| PETROLIA, TOWN OF                          | NA   | 0.00 | 0.00 | 0.00 | 0.24 | 0.96 | 0.39 | 0.49 | NA    | 0     | 0     | 0     | 174   | 1284  | 294   | 429   | NA     | 1893   | 1799   | 1851   | 1805   | 3340   | 1867   | 2185   | NA   | 0.00 | 0.00 | 0.00 | 0.10 | 0.38 | 0.16 | 0.20 |      |
| PLYMPTON-WYOMING, TOWN OF                  | 0.03 | 0.03 | 0.00 | 0.04 | 0.04 | 0.03 | 0.02 | 0.03 | 38    | 39    | 32    | 56    | 51    | 43    | 31    | 40    | 2823   | 2897   | 3120   | 3243   | 3145   | 3285   | 3163   | 3233   | 0.01 | 0.01 | 0.01 | 0.02 | 0.02 | 0.01 | 0.01 | 0.01 |      |
| POWASSAN, MUNICIPALITY OF                  | 0.00 | 0.00 | 0.00 | 0.00 | 0.00 | 0.00 | 0.00 | 0.00 | 0     | 0     | 0     | 0     | 0     | 0     | 0     | 0     | 3800   | 1323   | 1070   | 1148   | 1152   | 1021   | 1196   | 1303   | 0.00 | 0.00 | 0.00 | 0.00 | 0.00 | 0.00 | 0.00 | 0.00 |      |
| PRESCOTT, TOWN OF                          | 0.27 | 0.32 | 0.38 | 0.22 | 0.32 | 0.30 | 0.30 | 0.00 | 150   | 166   | 176   | 114   | 185   | 196   | 199   | 0     | 1409   | 1310   | 1170   | 1300   | 1446   | 1611   | 1643   | 1475   | 0.11 | 0.13 | 0.15 | 0.09 | 0.13 | 0.12 | 0.12 | 0.00 |      |
| PRINCE, TOWNSHIP OF                        | 0.00 | 0.00 | 0.00 | 0.00 | 0.00 | 0.00 | 0.00 | 0.00 | 0     | 0     | 0     | 0     | 0     | 0     | 0     | 0     | 437    | 274    | 356    | 367    | 304    | 344    | 281    | 232    | 0.00 | 0.00 | 0.00 | 0.00 | 0.00 | 0.00 | 0.00 | 0.00 |      |
| QUINTE WASTE SOLUTIONS                     | 0.00 | 0.10 | 0.12 | 0.18 | 0.13 | 0.18 | 0.15 | 0.19 | 0     | 2078  | 2041  | 3176  | 2355  | 3091  | 2598  | 3225  | 38315  | 54412  | 44008  | 45064  | 46552  | 44015  | 42217  | 42436  | 0.00 | 0.00 | 0.05 | 0.07 | 0.00 | 0.00 | 0.00 | 0.00 |      |
| RAINY RIVER FIRST NATIONS                  | NA   | NA   | 0.00 | 0.00 | 0.00 | 0.00 | 0.00 | 0.00 | NA    | NA    | 0     | 0     | 0     | 0     | 0     | 0     | NA     | NA     | 83     | 97     | 115    | 249    | 120    | 120    | NA   | NA   | 0.00 | 0.00 | 0.00 | 0.00 | 0.00 | 0.00 |      |
| RAINY RIVER, TOWN OF                       | NA   | NA   | 0.00 | 0.00 | 0.00 | 0.00 | 0.00 | 0.00 | NA    | NA    | 0     | 0     | 0     | 0     | 0     | 0     | NA     | NA     | 247    | 295    | 276    | 2597   | 252    | 392    | NA   | NA   | 0.00 | 0.00 | 0.00 | 0.00 | 0.00 | 0.00 |      |
| RED LAKE, MUNICIPALITY OF                  | NA   | NA   | NA   | NA   | NA   | NA   | 0.00 | 0.14 | NA    | 71    | NA     | NA     | NA     | NA     | NA     | NA     | 2627   | 1245   | NA   | NA   | NA   | NA   | NA   | NA   | 0.00 | 0.06 |      |
| RENFREW, TOWN OF                           | 0.03 | 0.02 | 0.05 | 0.04 | 0.03 | 0.06 | 0.07 | 0.03 | 44    | 29    | 48    | 47    | 33    | 69    | 74    | 29    | 4340   | 4775   | 2611   | 2821   | 2611   | 2816   | 2852   | 2531   | 0.01 | 0.01 | 0.02 | 0.02 | 0.01 | 0.02 | 0.03 | 0.01 |      |
| RIDEAU LAKES, TOWNSHIP OF                  | 0.00 | 0.00 | 0.00 | 0.00 | 0.00 | 0.00 | 0.00 | 0.00 | 0     | 0     | 0     | 0     | 0     | 0     | 0     | 0     | 3225   | 2337   | 3414   | 2039   | 3167   | 4916   | 3802   | 2963   | 0.00 | 0.00 | 0.00 | 0.00 | 0.00 | 0.00 | 0.00 | 0.00 |      |
| RUSSELL, TOWNSHIP OF                       | 0.05 | 0.08 | 0.18 | 0.00 | 0.42 | 0.35 | 0.27 | 0.29 | 200   | 213   | 478   | 0     | 1224  | 936   | 601   | 775   | 9353   | 6899   | 6467   | 5543   | 7332   | 6692   | 5465   | 6674   | 0.02 | 0.03 | 0.07 | 0.00 | 0.17 | 0.14 | 0.11 | 0.12 |      |
| SABLES-SPANISH RIVERS, TOWNSHIP OF         | 0.00 | 0.00 | 0.00 | 0.00 | 0.00 | 0.00 | 0.00 | 0.00 | 0     | 0     | 0     | 0     | 0     | 0     | 0     | 0     | 3349   | 418    | 799    | 905    | 992    | 836    | 1377   | 2580   | 0.00 | 0.00 | 0.00 | 0.00 | 0.00 | 0.00 | 0.00 | 0.00 |      |
| SAGAMOK ANISHNAWBEK FIRST NATION           | NA   | NA   | 0.00 | 0.00 | 0.00 | 0.00 | 0.00 | 0.00 | NA    | NA    | 0     | 0     | 0     | 0     | 0     | 0     | NA     | NA     | 806    | 757    | 753    | 580    | 929    | NA     | NA   | 0.00 | 0.00 | 0.00 | 0.00 | 0.00 | 0.00 | 0.00 | 0.00 |
| SARNIA, CITY OF                            | 0.45 | 0.45 | 0.48 | 0.44 | 0.42 | 0.43 | 0.39 | 0.37 | 5043  | 4608  | 4995  | 5301  | 4810  | 5030  | 5026  | 4226  | 27867  | 25782  | 26041  | 30068  | 28824  | 29589  | 32600  | 28590  | 0.18 | 0.18 | 0.19 | 0.18 | 0.17 | 0.17 | 0.15 | 0.15 |      |
| SAULT NORTH WASTE MANAGEMENT COUNCIL       | NA   | 0.00 | 0.00 | 0.00 | 0.00 | 0.00 | 0.00 | 0.00 | NA    | 0     | 0     | 0     | 0     | 0     | 0     | 0     | 1824   | 1599   | 1688   | 1722   | 1357   | 1602   | 1563   | 0.00   | 0.00 | 0.00 | 0.00 | 0.00 | 0.00 | 0.00 | 0.00 | 0.00 | 0.00 |
| SAULT STE. MARIE, CITY OF                  | 0.06 | 0.07 | 0.06 | 0.09 | 0.09 | 0.12 | 0.09 | 0.10 | 807   | 871   | 840   | 1151  | 1153  | 1545  | 1339  | 1272  | 31402  | 30352  | 32600  | 33066  | 33887  | 32009  | 35456  | 32376  | 0.03 | 0.03 | 0.03 | 0.03 | 0.03 | 0.05 | 0.04 | 0.04 |      |
| SEGUIN, TOWNSHIP OF                        | 0.00 | 0.00 | 0.00 | 0.00 | 0.00 | 0.00 | 0.01 | 0.01 | 0     | 0     | 0     | 0     | 0     | 18    | 8     | 3301  | 3159   | 1807   | 3221   | 3160   | 3366   | 3178   | 3617   | 0.00   | 0.00 | 0.00 | 0.00 | 0.00 | 0.00 | 0.01 | 0.00 |      |      |
| SERPENT RIVER FIRST NATIONS                | NA   | NA   | 0.00 | NA   | 0.00 | 0.00 | 0.00 | 0.00 | NA    | NA    | 0     | NA    | 0     | 0     | 0     | 0     | NA     | NA     | 133    | NA     | 158    | 138    | 184    | 177    | NA   | NA   | 0.00 | 0.00 | 0.00 | 0.00 | 0.00 | 0.00 | 0.00 |
| SHELburne, TOWN OF                         | 0.27 | 0.32 | 0.36 | 0.40 | 0.39 | 0.44 | 0.38 | NA   | 232   | 281   | 343   | 374   | 367   | 453   | 385   | NA    | 2133   | 2170   | 2415   | 2321   | 2351   | 2553   | 2542   | NA     | 0.11 | 0.13 | 0.14 | 0.16 | 0.16 | 0.18 | 0.15 | 0.00 |      |
| SHUNIAH, MUNICIPALITY OF                   | NA   | 0.00 | 0.00 | 0.00 | 0.00 | 0.00 | 0.00 | 0.00 | NA    | 0     | 0     | 0     | 0     | 0     | 0     | 0     | 895    | 1018   | 984    | 917    | 894    | 900    | 1020   | NA     | 0.00 | 0.00 | 0.00 | 0.00 | 0.00 | 0.00 | 0.00 | 0.00 |      |
| SIMCOE, COUNTY OF                          | 0.15 | 0.17 | 0.23 | 0.46 | 0.49 | 0.51 | 0.54 | 0.40 | 7001  | 8455  | 11005 | 22676 | 21931 | 23584 | 28761 | 22209 | 115249 | 122470 | 119971 | 121942 | 112808 | 116551 | 132229 | 137279 | 0.06 | 0.07 | 0.09 | 0.19 | 0.19 | 0.20 | 0.22 | 0.16 |      |
| SIoux LOOKOUT, TOWN OF                     | 0.00 | 0.00 | 0.00 | 0.00 | 0.20 | 0.29 | 0.19 | 0.16 | 0     | 0     | 0     | 0     | 105   | 141   | 88    | 87    | 1959   | 1735   | 1528   | 129    |        |        |        |        |      |      |      |      |      |      |      |      |      |



## REFERENCES

- (1) Andersen, J. K.; Boldrin, A.; Christensen, T. H.; Scheutz, C. Mass balances and life-cycle inventory for a garden waste windrow composting plant (Aarhus, Denmark). *Waste Manag. Res.* **2010**, *28* (11), 1010–1020 DOI: 10.1177/0734242X10360216.
- (2) Banks, C. J.; Chesshire, M.; Heaven, S.; Arnold, R. Anaerobic digestion of source-segregated domestic food waste: Performance assessment by mass and energy balance. *Bioresour. Technol.* **2011**, *102* (2), 612–620 DOI: 10.1016/j.biortech.2010.08.005.
- (3) Zabaleta, I.; Rodic, L. Recovery of essential nutrients from municipal solid waste - Impact of waste management infrastructure and governance aspects. *Waste Manag.* **2015**, *44*, 178–187 DOI: 10.1016/j.wasman.2015.07.033.
- (4) Pognani, M.; Barrena, R.; Font, X.; Sanchez, A. A complete mass balance of a complex combined anaerobic/aerobic municipal source-separated waste treatment plant. *Waste Manag.* **2012**, *32* (5), 799–805 DOI: 10.1016/j.wasman.2011.12.018.
- (5) Field, J. A.; Caldwell, J. S.; Jeyanayagam, S.; Reneau, R. B.; Kroontje, W.; Collins, E. R. Fertilizer Recovery from Anaerobic Digesters. *Trans. ASAE* **1984**, 56–60.
- (6) Schievano, A.; D'Imporzano, G.; Salati, S.; Adani, F. On-field study of anaerobic digestion full-scale plants (Part I): An on-field methodology to determine mass, carbon and nutrients balance. *Bioresour. Technol.* **2011**, *102* (17), 7737–7744 DOI: 10.1016/j.biortech.2011.06.006.
- (7) Möller, K.; Müller, T. Effects of anaerobic digestion on digestate nutrient availability and crop growth: A review. *Eng. Life Sci.* **2012**, *12* (3), 242–257 DOI: 10.1002/elsc.201100085.
- (8) Marcato, C. E.; Pinelli, E.; Pouech, P.; Winterton, P.; Guisresse, M. Particle size and metal distributions in anaerobically digested pig slurry. *Bioresour. Technol.* **2008**, *99* (7), 2340–2348 DOI: 10.1016/j.biortech.2007.05.013.
- (9) Michel Jr., F. C. P. Mass and Nutrient Losses During the Composting Of Dairy Manure Amended with Sawdust or Straw. *Compost Sci. Util.* **2004**, *12* (4), 323–334 DOI: 10.1080/1065657X.2004.10702201.
- (10) Masse, D. I.; Croteau, F.; Masse, L. The fate of crop nutrients during digestion of swine manure in psychrophilic anaerobic sequencing batch reactors. *Bioresour. Technol.* **2007**, *98* (15), 2819–2823 DOI: 10.1016/j.biortech.2006.07.040.
- (11) Tiquia, S. M.; Richard, T. L.; Honeyman, M. S. Carbon, nutrient, and mass loss during composting. *Nutr. Cycl. Agroecosystems* **2002**, *62* (1), 15–24 DOI: 10.1023/A:1015137922816.
- (12) van der Werf, P. *Ontario Organic Waste Management Report 2013-2033*; London, 2013.
- (13) Barth, J.; Amlinger, F.; Favoino, E.; Siebert, S.; Kehres, B.; Gottschall, R.; Bidlingmaier, W. *Compost production and use in the EU*; 2008.
- (14) Zhang, H.; Matsuto, T. Comparison of mass balance, energy consumption and cost of composting facilities for different types of organic waste. *Waste Manag.* **2011**, *31* (3), 416–422 DOI: 10.1016/j.wasman.2010.09.010.
